# Supplementary material for: HMMvar-func: a new method for predicting the functional outcome of genetic variants
Source: BMC Bioinformatics. 2015 Oct 30;16:351. doi: 10.1186/s12859-015-0781-z (PMC4628267; doi:10.1186/s12859-015-0781-z)
Supplement: Additional file 1 — Supplementary Tables. (XLSX 323 kb) [file 12859_2015_781_MOESM1_ESM.xlsx]

## Sheet: Table 1
Table 1 TSHr mutations and confidence scores (CS) of functional types
VID	Ref	Alt	Pos	Type	LoF CS	SoF CS	GoF CS	CoF CS
1	H	N	271	gain	0.284819	42.2709	57.0598	0.384466
2	S	N	281	gain	19.483	35.5004	29.0653	15.9513
4	S	I	281	gain	1.85422	74.9983	22.589	0.558481
5	S	T	281	gain	2.48976	50.0082	45.2493	2.25283
6	S	I	425	gain	0.279875	61.9661	37.5843	0.169753
7	A	I	428	gain	30.67	33.8956	18.6023	16.8321
8	A	V	428	gain	22.6029	37.2659	24.9801	15.1512
10	G	S	431	gain	43.142	21.4237	11.7576	23.6768
12	M	T	453	gain	33.4094	33.4094	16.5906	16.5906
17	M	V	463	gain	1.81015	73.2159	24.3714	0.602548
19	A	V	485	gain	4.98752	45.0125	45.0125	4.98752
20	I	N	486	gain	0.714483	17.5281	78.5554	3.20209
22	I	M	486	gain	2.38284	14.4153	71.3996	11.8023
23	I	F	486	gain	1.22768	20.1888	74.0788	4.50473
25	S	R	505	gain	3.74415	41.2724	50.4103	4.57312
26	S	N	505	gain	1.73052	31.4507	63.3339	3.48484
29	V	A	509	gain	10.1536	27.6004	45.5054	16.7405
30	L	R	512	gain	16.0665	26.4892	35.7567	21.6875
32	L	Q	512	gain	15.1512	22.6029	37.2659	24.9801
34	I	T	568	gain	6.18042	41.3217	45.6675	6.83042
37	I	V	568	gain	1.38385	16.8587	75.5555	6.20197
38	E	K	575	gain	1.13209	27.773	68.3105	2.78449
39	A	N	593	gain	7.77377	21.1313	51.9746	19.1204
40	V	L	597	gain	2.19268	26.7124	65.7018	5.39313
42	V	F	597	gain	5.22141	34.9098	52.0793	7.78943
44	Y	N	601	gain	12.7721	51.7935	28.4249	7.00949
45	D	Y	617	gain	2.26304	50.2349	45.4544	2.04768
46	D	G	619	gain	15.4491	41.9951	31.1107	11.445
47	T	I	620	gain	2.37018	52.6132	43.0761	1.94054
48	A	C	623	gain	13.316	26.8152	40.0036	19.8652
49	A	I	623	gain	22.5083	27.4917	27.4917	22.5083
50	A	F	623	gain	44.5486	24.4488	10.9856	20.017
51	A	S	623	gain	6.71654	20.1776	54.8484	18.2574
53	A	V	623	gain	15.1512	24.9801	37.2659	22.6029
55	M	I	626	gain	21.3838	26.1183	28.8651	23.6328
56	A	V	627	gain	12.4417	27.6895	41.3079	18.5608
57	L	F	629	gain	11.7576	23.6768	43.142	21.4237
60	I	L	630	gain	4.15421	22.7399	61.8135	11.2923
62	F	C	631	gain	45.5054	27.6004	10.1536	16.7405
63	F	I	631	gain	23.6328	28.8651	26.1183	21.3838
65	F	L	631	gain	16.9956	28.021	34.2249	20.7585
69	F	S	631	gain	51.766	23.26	7.74257	17.2314
70	T	A	632	gain	13.3779	24.3762	40.1895	22.0565
72	T	I	632	gain	20.7585	34.2249	28.021	16.9956
76	D	A	633	gain	32.9098	40.1961	14.7873	12.1068
77	D	E	633	gain	4.03369	26.9689	60.0203	8.97715
78	D	H	633	gain	14.7873	40.1961	32.9098	12.1068
80	D	Y	633	gain	33.9324	50.6211	9.24764	6.19888
83	I	V	635	gain	0.358535	7.95873	87.7305	3.95219
84	C	W	636	gain	9.36213	76.4528	12.6376	1.54755
85	P	A	639	gain	53.3397	21.6863	7.21874	17.7552
86	P	S	639	gain	50.4412	22.6647	8.33787	18.5563
88	I	K	640	gain	45.9029	25.192	10.2423	18.6627
89	A	V	647	gain	15.1512	24.9801	37.2659	22.6029
90	N	Y	650	gain	11.9426	59.1523	24.0495	4.85552
91	V	F	656	gain	12.152	40.346	36.5065	10.9956
92	F	L	666	gain	3.11238	41.9042	51.1819	3.80147
93	N	S	670	gain	3.0094	49.4885	44.7791	2.72302
94	C	T	672	gain	39.5226	43.6792	8.81869	7.97948
95	L	V	677	gain	5.78086	19.1931	57.6593	17.3667
96	I	F	691	gain	2.30049	37.8307	56.4368	3.43193
97	P	T	27	loss	45.0166	0	0	54.9834
98	C	*	31	loss	99.9983	0	0	0.00167014
99	E	K	34	loss	31.0026	0	0	68.9974
100	C	S	41	loss	99.394	0	0	0.60598
101	R	P	46	loss	90.025	0	0	9.97505
102	P	S	68	loss	91.1797	8.27164	0.045631	0.502999
103	Q	P	90	loss	5.23449	52.2098	38.6779	3.87781
104	R	Q	109	loss	0.942456	46.5596	51.4563	1.04157
105	G	R	132	loss	0.815125	49.1849	49.1849	0.815125
106	T	I	145	loss	3.9716	53.4726	39.6135	2.94224
107	P	A	162	loss	1.05036	70.0446	28.478	0.427044
108	P	L	162	loss	0.0749301	90.8128	9.10478	0.0075124
109	I	N	167	loss	30.1089	44.9171	14.9516	10.0224
110	R	K	183	loss	NA	NA	NA	NA
111	A	V	204	loss	6.66521	60.1536	29.8714	3.30984
112	G	S	245	loss	2.47845	82.075	14.9938	0.452772
113	L	P	252	loss	4.33927	78.8626	15.9221	0.876084
114	P	S	264	loss	63.5942	23.395	3.49916	9.51169
115	R	C	310	loss	81.7574	0	0	18.2426
116	Q	*	324	loss	99.9899	0	0	0.0101029
117	C	W	390	loss	6.61581	89.0735	4.01269	0.298037
118	D	N	403	loss	18.6023	33.8956	30.67	16.8321
119	D	N	410	loss	2.30049	37.8307	56.4368	3.43193
120	Y	*	444	loss	52.4979	47.5021	8.81349e-06	9.74042e-06
121	R	H	450	loss	2.77461	37.3566	55.7295	4.13923
122	Y	C	466	loss	91.1511	4.10629	0.20444	4.53815
123	L	P	467	loss	36.7392	18.2442	14.9371	30.0795
124	V	I	473	loss	3.2282	39.3275	53.0866	4.35762
125	T	I	477	loss	57.9423	35.1438	2.61026	4.30359
126	W	R	488	loss	22.4828	67.5421	7.48388	2.49117
127	Q	H	489	loss	23.6328	28.8651	26.1183	21.3838
128	G	S	498	loss	2.24985	55.1944	40.889	1.66673
129	R	C	519	loss	67.4363	18.3785	3.03795	11.1472
130	R	G	519	loss	49.0537	22.0412	8.9613	19.9437
131	F	L	525	loss	5.45484	44.5452	44.5452	5.45484
132	F	S	525	loss	1.76383	71.342	26.2453	0.648876
133	M	T	527	loss	11.2243	55.5945	27.6074	5.57384
134	R	W	531	loss	15.6548	70.1601	11.5974	2.58773
135	W	*	546	loss	99.9993	0.000679036	5.12228e-11	7.54341e-06
136	A	T	553	loss	5.20786	25.7947	57.4071	11.5903
137	P	R	556	loss	58.9581	19.6254	5.34855	16.0679
138	I	T	583	loss	7.33742	40.1647	44.3888	8.1091
139	A	V	593	loss	19.1572	25.8594	31.5848	23.3986
140	C	R	600	loss	2.21943	40.3363	54.4483	2.99592
141	T	I	607	loss	57.186	42.3644	0.191342	0.258285
142	R	Q	609	loss	NA	NA	NA	NA
143	R	*	609	loss	NA	NA	NA	NA
144	L	V	653	loss	4.94026	20.0337	60.1847	14.8414
145	T	*	655	loss	95.2573	4.74258	4.81672e-06	9.67463e-05
146	V	G	689	loss	7.79945	47.1839	38.6309	6.38565

## Sheet: Table 2
Table 2 TP53 mutations and confidence scores of functional types
VID	Ref	Alt	Pos	Transactivity class	Transactivity Level	LoF CS	SoF CS	GoF CS	CoF CS
2	G	A	4	functional	139.95	0.788327	26.1058	70.963	2.1429
3	G	C	4	functional	127.2	0.732043	24.2419	72.8268	2.19918
5	A	C	5	functional	120.05	2.01824	40.5375	54.7199	2.72434
6	A	G	5	functional	87.5	2.14347	28.8591	64.2271	4.77037
7	A	T	5	supertrans	140.2	2.61701	64.2018	31.8817	1.29957
9	G	C	6	functional	91.05	1.27548	25.6187	69.6387	3.46711
10	G	T	6	functional	91.05	1.27548	25.6187	69.6387	3.46711
11	G	A	7	functional	135.1	1.46239	53.521	43.8193	1.19731
12	G	C	7	functional	139.4	4.89783	59.6678	32.7464	2.68799
14	A	C	8	functional	106.4	2.97429	66.0232	29.6661	1.33643
15	A	G	8	functional	80.3	3.9824	48.5155	43.8987	3.60342
16	A	T	8	functional	115.9	3.3116	81.2419	14.8416	0.604974
18	G	C	9	functional	99	1.77856	48.2214	48.2214	1.77856
19	G	T	9	functional	99	1.77856	48.2214	48.2214	1.77856
20	C	A	10	functional	94.05	0.349143	21.0674	77.3024	1.28111
21	C	G	10	functional	75.55	1.22768	20.1888	74.0788	4.50473
22	C	T	10	functional	87.95	1.03168	18.7499	76.0347	4.18367
23	C	A	11	functional	125.9	0.812326	54.1711	44.3515	0.665077
24	C	G	11	functional	91.25	0.721809	39.4094	58.792	1.07681
25	C	T	11	functional	94.3	3.5866	79.6152	16.074	0.724123
29	C	A	13	functional	99.75	1.13209	27.773	68.3105	2.78449
30	C	G	13	functional	81.85	0.468893	56.9754	42.2084	0.347364
32	A	C	14	partially functional	61.5	7.28972	59.5291	29.5613	3.61997
33	A	G	14	functional	76.85	1.27548	25.6187	69.6387	3.46711
34	A	T	14	functional	79.6	5.0491	83.0306	11.237	0.683321
36	G	C	15	functional	99.5	0.906589	22.2409	73.8425	3.00998
37	G	T	15	functional	99.5	0.906589	22.2409	73.8425	3.00998
38	T	A	16	functional	110.5	1.43161	23.5424	70.7252	4.3008
39	T	C	16	functional	102.85	0.86227	70.2327	28.5545	0.350573
40	T	G	16	partially functional	45.4	0.852731	18.9289	76.7604	3.45799
43	C	T	17	functional	107.75	0.619459	61.6265	37.3783	0.375721
47	G	A	19	functional	88.3	1.96901	35.7851	58.9996	3.24635
48	G	C	19	functional	100	2.30049	37.8307	56.4368	3.43193
49	G	T	19	functional	95.8	5.06875	61.75	30.6642	2.51707
50	A	C	20	partially functional	20.35	2.47626	54.968	40.7213	1.83446
51	A	G	20	partially functional	61.05	3.2282	39.3275	53.0866	4.35762
52	A	T	20	partially functional	65.45	4.84696	79.7065	14.5611	0.885459
53	T	A	21	functional	90.6	0.0906071	18.1519	81.3514	0.406073
55	T	G	21	functional	90.6	0.0906071	18.1519	81.3514	0.406073
56	C	A	22	functional	81	0.0110976	9.96395	89.9248	0.100156
57	C	G	22	functional	88.4	0.045631	8.27164	91.1797	0.502999
58	C	T	22	functional	75.2	0.0408241	18.2017	81.5745	0.182961
59	C	A	23	functional	104.1	0.0992697	9.87578	89.129	0.89591
60	C	G	23	functional	116.1	0.100116	9.01218	89.8891	0.998578
61	C	T	23	functional	108.7	0.000407962	0.900922	99.0538	0.0448543
65	A	C	25	functional	86.4	0.885459	14.5611	79.7065	4.84696
66	A	G	25	functional	86.7	0.00551399	9.96953	89.9752	0.0497639
67	A	T	25	functional	85.25	0.648909	17.5936	78.8492	2.90821
68	G	A	26	partially functional	21.2	0.665857	14.7807	80.9086	3.64487
69	G	C	26	functional	107.85	0.192223	12.8186	85.704	1.28518
70	G	T	26	functional	113	0.823385	22.3241	74.1187	2.73373
71	C	A	27	functional	86.4	0.885459	14.5611	79.7065	4.84696
72	C	G	27	functional	86.4	0.885459	14.5611	79.7065	4.84696
74	G	A	28	functional	134.1	0.104267	2.82696	93.6159	3.45285
75	G	C	28	functional	120.7	1.21929	36.5348	60.2357	2.01026
76	G	T	28	functional	110.75	0.516135	42.0396	56.7475	0.696709
77	T	A	29	partially functional	68.9	3.33312	90.3695	6.07333	0.224004
78	T	C	29	functional	94.45	2.86621	47.1338	47.1338	2.86621
79	T	G	29	functional	99.25	3.81273	69.2931	25.4915	1.40263
83	G	A	31	functional	116.3	2.16422	35.5898	58.6777	3.5682
84	G	C	31	functional	128.9	2.43947	40.1163	54.1513	3.29294
86	A	C	32	functional	125.2	2.73795	49.76	45.0247	2.4774
87	A	G	32	functional	101.8	4.5004	33.2537	54.826	7.4199
88	A	T	32	functional	122.85	1.18515	79.0332	19.4894	0.292254
90	G	C	33	functional	135.75	0.46862	20.9479	76.864	1.71951
91	G	T	33	functional	135.75	0.46862	20.9479	76.864	1.71951
92	C	A	34	partially functional	53.55	1.08931	65.7295	32.6403	0.540937
93	C	G	34	functional	118.65	0.571674	56.8726	42.1322	0.423506
94	C	T	34	partially functional	30.45	0.746644	74.2794	24.7255	0.248536
95	C	A	35	supertrans	150.75	0.78308	63.7826	35.0046	0.429763
96	C	G	35	functional	121.4	0.801458	59.0673	39.594	0.537234
97	C	T	35	functional	120.6	0.0273668	66.7914	33.1676	0.0135899
102	C	A	37	supertrans	149.4	12.3132	49.9327	30.2857	7.46836
103	C	G	37	supertrans	145.35	7.72326	42.2767	42.2767	7.72326
104	C	T	37	functional	99.75	2.72434	54.7199	40.5375	2.01824
105	C	A	38	functional	131.5	11.5903	57.4071	25.7947	5.20786
106	C	G	38	functional	123.5	2.88037	63.9384	31.7509	1.43035
107	C	T	38	functional	107.55	0.692607	93.0101	6.25079	0.046547
111	C	A	40	functional	128.2	5.12535	28.0559	56.4976	10.3212
112	C	G	40	functional	123.25	1.21929	36.5348	60.2357	2.01026
114	T	A	41	functional	119	15.869	71.1201	10.6373	2.37351
115	T	C	41	functional	97.7	8.48229	84.6039	6.28383	0.63001
116	T	G	41	functional	110.65	1.99547	73.0305	24.3098	0.664233
120	A	C	43	functional	97.25	10.3212	56.4976	28.0559	5.12535
121	A	G	43	functional	117.2	13.1934	29.3624	39.6351	17.8092
122	A	T	43	functional	110.1	6.74131	33.3899	49.8119	10.0569
123	G	A	44	functional	108.8	13.3364	59.7695	21.988	4.90618
124	G	C	44	functional	108.05	10.4793	46.965	34.7925	7.76325
125	G	T	44	functional	99.3	13.7337	68.0237	15.1781	3.06441
126	T	A	45	functional	97.25	10.3212	56.4976	28.0559	5.12535
128	T	G	45	functional	97.25	10.3212	56.4976	28.0559	5.12535
129	C	A	46	functional	118.3	9.97315	54.5925	29.961	5.47338
130	C	G	46	functional	100.35	26.9689	60.0203	8.97715	4.03369
132	A	C	47	functional	89.45	18.7499	76.0347	4.18367	1.03168
133	A	G	47	functional	107.1	9.24764	50.6211	33.9324	6.19888
134	A	T	47	functional	125.3	36.2754	59.808	2.43791	1.47867
136	G	C	48	functional	103.1	16.9222	56.1837	20.6688	6.22533
137	G	T	48	functional	103.1	16.9222	56.1837	20.6688	6.22533
138	G	A	49	functional	86.2	1.68382	55.7604	41.3083	1.2474
139	G	C	49	functional	91.6	0.354226	64.2114	35.24	0.194404
141	A	C	50	functional	108.3	3.59846	65.399	29.3857	1.61689
142	A	G	50	functional	93.55	3.80147	51.1819	41.9042	3.11238
143	A	T	50	functional	116.2	7.13746	78.6774	13.0053	1.17981
144	A	C	51	functional	82.3	13.4471	36.5529	36.5529	13.4471
146	A	T	51	functional	82.3	13.4471	36.5529	36.5529	13.4471
147	A	C	52	functional	93.55	68.0514	25.0347	1.85942	5.05442
148	A	G	52	functional	104.5	3.70117	60.8645	33.4031	2.03125
149	A	T	52	functional	81	0.3265	79.8919	19.7011	0.0805139
150	C	A	53	functional	82.1	11.994	72.5595	13.2554	2.19111
151	C	G	53	functional	87.1	13.4752	66.7432	16.4587	3.32295
152	C	T	53	functional	112.15	8.15535	73.6021	16.4228	1.8197
156	T	A	55	functional	102.45	21.997	66.0827	8.94332	2.97697
157	T	C	55	functional	90.9	11.016	81.3981	6.68157	0.904252
158	T	G	55	functional	78.5	15.5239	76.8903	6.31154	1.27428
159	T	A	56	functional	76.25	8.59471	31.5365	47.047	12.8218
160	T	C	56	partially functional	66.65	86.6438	11.726	0.194331	1.43592
161	T	G	56	partially functional	72.05	53.8968	36.1281	4.00311	5.97194
162	T	A	57	functional	90.9	11.016	81.3981	6.68157	0.904252
164	T	G	57	functional	90.9	11.016	81.3981	6.68157	0.904252
165	T	A	58	functional	102.75	2.99592	54.4483	40.3363	2.21943
166	T	C	58	functional	100.15	22.7399	61.8135	11.2923	4.15421
167	T	G	58	functional	120.05	0.383568	42.1722	56.9265	0.517762
170	C	T	59	functional	81	21.5471	71.539	5.31346	1.60038
174	G	A	61	functional	84.45	0.55778	37.1963	61.3263	0.919623
175	G	C	61	functional	88.05	0.201072	32.9802	66.4139	0.404909
176	G	T	61	functional	94.7	0.297399	17.9452	80.4246	1.33285
177	A	C	62	functional	90.55	1.68971	45.8124	50.6305	1.86741
178	A	G	62	functional	86.35	1.06737	39.0639	58.2764	1.59233
179	A	T	62	functional	80.75	5.05442	68.0514	25.0347	1.85942
180	C	A	63	functional	100.55	0.573485	28.3316	69.6844	1.41055
181	C	G	63	functional	100.55	0.573485	28.3316	69.6844	1.41055
183	C	A	64	functional	88.15	0.732043	24.2419	72.8268	2.19918
184	C	G	64	partially functional	72.75	1.34296	36.4111	60.0318	2.21416
186	T	A	65	partially functional	56.7	4.98658	82.0026	12.265	0.745836
187	T	C	65	partially functional	55.75	60.1017	32.9845	2.44988	4.46397
188	T	G	65	partially functional	45.65	16.0679	58.9581	19.6254	5.34855
192	T	A	67	partially functional	55.9	26.1058	70.963	2.1429	0.788327
193	T	C	67	partially functional	55.9	26.1058	70.963	2.1429	0.788327
194	T	G	67	partially functional	57.55	25.9375	70.5054	2.60046	0.956657
196	G	C	68	partially functional	72.3	28.6914	70.5694	0.525501	0.213653
197	G	T	68	functional	86.15	5.1383	93.3843	1.40035	0.0770518
200	G	C	69	partially functional	69.05	27.3975	67.3871	3.70785	1.5075
201	G	T	69	partially functional	69.05	27.3975	67.3871	3.70785	1.5075
202	A	C	70	functional	95.05	1.14437	34.29	62.4805	2.08518
203	A	G	70	partially functional	60.8	2.61026	35.1438	57.9423	4.30359
205	A	C	71	partially functional	68.6	1.86045	45.6416	50.4418	2.05612
206	A	G	71	functional	86.25	0.292254	19.4894	79.0332	1.18515
207	A	T	71	partially functional	34.2	3.91287	71.1131	23.6715	1.30248
208	A	C	72	functional	100.7	0.189895	13.9952	84.6661	1.1488
210	A	T	72	functional	100.7	0.189895	13.9952	84.6661	1.1488
212	C	A	73	functional	81.9	0.602548	24.3714	73.2159	1.81015
213	C	G	73	partially functional	61.2	0.505411	37.2487	61.4127	0.833281
215	T	A	74	partially functional	63.8	0.710055	86.2791	12.9046	0.106202
216	T	C	74	partially functional	67.2	3.00626	90.0799	6.69056	0.223286
217	T	G	74	partially functional	69.25	1.00437	74.0216	24.6397	0.334325
223	C	A	76	functional	91.8	0.806547	24.1674	72.603	2.423
224	C	G	76	functional	85.05	1.10666	36.6474	60.4214	1.82457
225	C	T	76	functional	102.7	1.47867	36.2754	59.808	2.43791
226	T	A	77	partially functional	70.5	1.10844	73.9176	24.605	0.368967
227	T	C	77	partially functional	74.3	4.41469	88.6715	6.58595	0.327895
228	T	G	77	partially functional	67.7	1.00437	74.0216	24.6397	0.334325
233	C	A	79	functional	117.6	1.11197	90.5708	8.21639	0.100875
234	C	G	79	functional	103.45	1.72589	85.2633	12.7527	0.258139
235	C	T	79	functional	105.8	1.25439	92.4483	6.21303	0.0843019
236	C	A	80	non-functional	16.2	2.00613	89.6766	8.13528	0.181992
237	C	G	80	functional	103.6	3.20229	86.8227	9.62022	0.354824
238	C	T	80	non-functional	16.65	2.88344	95.4863	1.58246	0.0477863
243	G	A	82	functional	102.9	0.124164	16.674	82.5868	0.61499
244	G	C	82	functional	114.5	0.172043	14.0131	84.7741	1.0408
246	A	C	83	functional	113.7	0.573485	28.3316	69.6844	1.41055
247	A	G	83	functional	100.55	0.546463	24.4275	73.3843	1.64166
248	A	T	83	functional	103.75	1.95582	53.0276	43.4153	1.60129
249	A	C	84	functional	125	0.208636	22.9389	76.1598	0.692694
251	A	T	84	functional	125	0.208636	22.9389	76.1598	0.692694
253	A	C	85	functional	107	2.37129	47.6287	47.6287	2.37129
254	A	G	85	functional	104.25	2.60764	52.3758	42.8816	2.13495
255	A	T	85	functional	103.95	0.509997	68.4875	30.7734	0.229157
256	A	C	86	functional	116.25	0.602258	66.2165	32.8822	0.299072
257	A	G	86	functional	102.85	0.88666	72.2192	26.568	0.326184
258	A	T	86	functional	113.3	4.06985	81.745	13.5124	0.672741
259	C	A	87	functional	106.5	0.402436	32.7788	66.0084	0.810407
260	C	G	87	functional	106.5	0.402436	32.7788	66.0084	0.810407
263	A	C	88	functional	83	1.85519	55.5891	41.1814	1.37436
264	A	G	88	functional	79.4	2.95207	59.2939	35.9635	1.79052
265	A	T	88	functional	91.55	1.19181	71.914	26.4557	0.438442
266	A	C	89	functional	105.05	0.602258	66.2165	32.8822	0.299072
267	A	G	89	functional	92.7	3.46711	69.6387	25.6187	1.27548
268	A	T	89	functional	117.35	0.354058	86.6351	12.9579	0.0529559
269	C	A	90	functional	94.5	2.47626	54.968	40.7213	1.83446
270	C	G	90	functional	94.5	2.47626	54.968	40.7213	1.83446
272	G	A	91	functional	108.75	0.678562	12.3323	82.4524	4.53679
273	G	C	91	functional	95.3	0.415029	30.5875	68.0738	0.923663
274	G	T	91	partially functional	65.25	6.25791	46.24	41.8397	5.66239
275	T	A	92	partially functional	71.4	4.18437	92.8844	2.80487	0.126357
276	T	C	92	functional	87.1	3.83033	62.9884	31.2791	1.90209
277	T	G	92	functional	81.6	1.70259	84.1123	13.9037	0.281437
281	C	A	94	functional	93.15	0.658326	32.5229	65.4931	1.3257
282	C	G	94	functional	82.8	0.30817	37.4459	61.7378	0.508087
284	T	A	95	functional	81.55	1.90343	85.0857	12.7262	0.284694
285	T	C	95	functional	87.3	3.31119	89.775	6.66791	0.245934
286	T	G	95	functional	81.55	1.10844	73.9176	24.605	0.368967
293	T	A	97	functional	78.3	0.203852	24.7701	74.4136	0.612405
294	T	C	97	functional	115.05	0.0898762	73.016	26.8611	0.0330636
295	T	G	97	partially functional	33.7	0.397335	26.4968	72.0258	1.08007
296	C	A	98	functional	98.45	0.399378	39.7319	59.273	0.595802
297	C	G	98	functional	87.9	0.0753819	24.8986	74.7996	0.22646
298	C	T	98	functional	120.75	1.25695	56.1873	41.6246	0.931174
302	C	A	100	functional	120.55	0.0108253	2.64887	96.9441	0.396188
303	C	G	100	functional	120.9	0.0428995	4.26783	94.737	0.952281
304	C	T	100	non-functional	9.7	0.052553	3.50457	95.018	1.42485
305	C	A	101	functional	105.25	0.0289495	3.88762	95.3732	0.710205
306	C	G	101	functional	99.2	0.00651998	3.5506	96.2661	0.176774
307	C	T	101	non-functional	12.5	0.213653	28.6914	70.5694	0.525501
313	T	A	103	functional	86.25	0.0940944	4.64849	93.3675	1.88994
315	T	G	103	partially functional	64.15	0.0432337	3.18631	95.475	1.29546
317	T	C	104	partially functional	51.8	0.000449989	1.09824	98.8608	0.0405067
318	T	G	104	functional	105.2	1.07656	23.8974	71.7918	3.23417
320	G	C	105	functional	100.45	NA	NA	NA	NA
321	G	T	105	functional	100.45	NA	NA	NA	NA
322	C	A	106	functional	80.05	0.139224	15.3073	83.7914	0.762106
323	C	G	106	partially functional	69.55	0.0961702	12.9147	86.3462	0.642984
324	C	T	106	partially functional	68.1	0.0664991	26.8276	72.9251	0.180763
325	C	A	107	functional	79.35	0.407138	24.5669	73.8029	1.22311
326	C	G	107	functional	102.4	0.0428166	14.1423	85.5559	0.259025
327	C	T	107	non-functional	18.1	0.00162877	2.41107	97.5214	0.0658795
332	T	A	109	partially functional	71	0.16971	15.2768	83.6245	0.928984
333	T	C	109	functional	99.65	0.619459	61.6265	37.3783	0.375721
334	T	G	109	functional	91.6	0.164426	18.0781	81.0205	0.736904
335	C	A	110	functional	79.65	0.302895	24.6711	74.1161	0.909948
336	C	G	110	partially functional	61.85	0.113733	5.61868	92.3973	1.8703
337	C	T	110	functional	102.55	1.34296	36.4111	60.0318	2.21416
341	C	A	112	functional	86.25	0.183023	7.40279	90.1845	2.22968
342	C	G	112	functional	78.1	0.189895	13.9952	84.6661	1.1488
344	A	C	113	partially functional	61.85	0.050401	8.26687	91.1272	0.555579
345	A	G	113	functional	83	0.165987	7.41983	90.392	2.02214
346	A	T	113	functional	90.75	0.36003	26.5341	72.1272	0.978662
348	A	C	114	functional	87.65	0.200671	8.1166	89.4707	2.21203
350	A	T	114	functional	87.65	0.200671	8.1166	89.4707	2.21203
351	G	A	115	functional	94.7	0.459254	22.6883	75.3277	1.52478
352	G	C	115	partially functional	46.7	0.0695253	5.66289	93.1243	1.14332
353	G	T	115	functional	91.7	1.72666	23.2473	69.8388	5.18718
354	C	A	116	functional	77.75	0.149192	33.032	66.5183	0.300435
355	C	G	116	functional	123.55	0.703655	19.078	77.3649	2.85346
356	C	T	116	functional	110.4	0.654239	39.477	58.8928	0.976011
361	A	C	118	functional	90.15	1.39629	51.1016	46.2387	1.26341
362	A	G	118	functional	98.2	0.424019	11.4963	84.9466	3.1331
363	A	T	118	functional	90.15	1.39629	51.1016	46.2387	1.26341
364	T	A	119	functional	77.7	1.3149	71.791	26.4104	0.483724
365	T	C	119	functional	76	1.77571	53.2077	43.5628	1.45383
366	T	G	119	functional	90.35	1.08931	65.7295	32.6403	0.540937
367	G	A	120	functional	106.45	0.703655	19.078	77.3649	2.85346
368	G	C	120	functional	106.45	0.703655	19.078	77.3649	2.85346
369	G	T	120	functional	106.45	0.703655	19.078	77.3649	2.85346
371	G	A	121	functional	100.05	0.665857	14.7807	80.9086	3.64487
372	G	C	121	functional	82	0.549451	14.8971	81.5458	3.00767
373	G	T	121	functional	86.7	1.02819	27.8769	68.566	2.52893
374	A	C	122	partially functional	60.75	0.188943	22.9586	76.2252	0.627314
375	A	G	122	functional	83.1	0.888355	24.0856	72.3572	2.66876
376	A	T	122	functional	108.55	1.26044	34.1739	62.269	2.29668
377	T	A	123	partially functional	45.75	0.703655	19.078	77.3649	2.85346
379	T	G	123	partially functional	45.75	0.703655	19.078	77.3649	2.85346
380	G	A	124	functional	97.45	0.23992	19.5417	79.2455	0.972924
381	G	C	124	functional	93.6	0.187342	15.2592	83.528	1.0255
382	G	T	124	non-functional	15.6	1.95582	53.0276	43.4153	1.60129
383	A	C	125	functional	89.9	0.494595	44.522	54.3793	0.604099
384	A	G	125	functional	96.85	0.330213	32.851	66.1538	0.664967
385	A	T	125	functional	99.4	2.66876	72.3572	24.0856	0.888355
386	T	A	126	functional	82	0.221254	18.0213	80.7659	0.99159
388	T	G	126	functional	82	0.221254	18.0213	80.7659	0.99159
389	T	A	127	functional	93.4	0.519892	28.3852	69.8162	1.27873
391	T	G	127	functional	104.75	0.806547	24.1674	72.603	2.423
393	T	C	128	functional	90.1	1.69544	50.8025	45.968	1.5341
394	T	G	128	functional	132.35	2.53789	76.0456	20.7248	0.691656
396	G	C	129	functional	119	0.427044	28.478	70.0446	1.05036
397	G	T	129	functional	119	0.427044	28.478	70.0446	1.05036
399	A	C	130	functional	76.55	0.100875	8.21639	90.5708	1.11197
400	A	G	130	functional	82.95	0.46862	20.9479	76.864	1.71951
401	A	T	130	functional	76.55	0.100875	8.21639	90.5708	1.11197
402	T	A	131	partially functional	60.3	0.468893	56.9754	42.2084	0.347364
403	T	C	131	partially functional	55	1.02674	41.529	56.0583	1.38596
404	T	G	131	functional	83.8	0.117455	47.3846	52.3681	0.129808
405	G	A	132	functional	109.9	0.172043	14.0131	84.7741	1.0408
406	G	C	132	functional	109.9	0.172043	14.0131	84.7741	1.0408
407	G	T	132	functional	109.9	0.172043	14.0131	84.7741	1.0408
408	C	A	133	functional	135.35	0.805591	14.6409	80.1437	4.40976
409	C	G	133	functional	120.05	0.678562	12.3323	82.4524	4.53679
411	T	A	134	functional	97.45	1.21929	36.5348	60.2357	2.01026
412	T	C	134	functional	104	0.5929	39.5383	58.9843	0.884503
413	T	G	134	functional	110.1	1.18441	23.7896	71.4678	3.55817
421	T	A	136	functional	118.75	0.542504	16.2557	80.5148	2.68704
422	T	C	136	supertrans	141.7	0.126994	23.0205	76.4308	0.421636
423	T	G	136	non-functional	10.3	0.118628	11.8017	87.2032	0.876552
425	C	A	137	supertrans	149.35	0.12288	8.19439	90.3282	1.35452
426	C	G	137	supertrans	165.95	0.284694	12.7262	85.0857	1.90343
427	C	T	137	functional	117.45	0.368967	24.605	73.9176	1.10844
434	C	A	139	supertrans	165	0.109595	9.86545	89.0359	0.989099
435	C	G	139	supertrans	141.05	0.0184553	9.09384	90.7036	0.184077
436	C	T	139	supertrans	165.45	0.120982	9.85407	88.9331	1.09186
438	C	A	140	supertrans	162.6	0.0754926	7.51033	91.4945	0.919688
439	C	G	140	supertrans	142.45	0.075962	6.83788	92.0634	1.02273
440	C	T	140	partially functional	55.8	1.86045	45.6416	50.4418	2.05612
445	G	A	142	functional	98.35	NA	NA	NA	NA
446	G	C	142	functional	137.05	0.0640752	3.16547	94.8505	1.91996
447	G	T	142	functional	79.55	0.00888897	2.40381	97.2278	0.359535
448	A	C	143	functional	98.55	0.0431423	3.51398	95.2732	1.1697
449	A	G	143	functional	134.35	0.0580873	1.74053	95.0299	3.17146
450	A	T	143	functional	83.8	0.0944952	3.82208	93.7652	2.31821
451	C	A	144	functional	103.2	0.0913814	8.22589	90.6754	1.00731
452	C	G	144	functional	103.2	0.0913814	8.22589	90.6754	1.00731
454	G	A	145	functional	117.6	0.505411	37.2487	61.4127	0.833281
455	G	C	145	non-functional	18.6	0.49022	32.691	65.8316	0.987183
456	G	T	145	functional	136.4	0.606422	49.3936	49.3936	0.606422
457	A	C	146	functional	126.9	0.545981	44.4706	54.3165	0.666863
458	A	G	146	functional	124.7	0.36456	32.8167	66.0846	0.734134
459	A	T	146	partially functional	69.55	0.0553433	44.9613	54.9158	0.0675965
461	T	A	147	functional	104.7	0.429763	35.0046	63.7826	0.78308
463	T	G	147	functional	104.7	0.429763	35.0046	63.7826	0.78308
465	A	C	148	functional	98.65	2.48976	50.0082	45.2493	2.25283
466	A	G	148	functional	81.5	0.0702756	4.24045	94.1293	1.55997
467	A	T	148	functional	105.75	0.606422	49.3936	49.3936	0.606422
469	T	A	149	partially functional	51.25	4.12554	82.8636	12.3938	0.617051
470	T	C	149	partially functional	56	0.429763	35.0046	63.7826	0.78308
471	T	G	149	partially functional	27.5	3.94592	79.2559	16.0015	0.796667
474	T	G	150	functional	94.45	0.467558	42.0882	56.8131	0.631137
478	G	A	151	functional	104.5	0.0473617	4.26336	94.6379	1.05133
479	G	C	151	functional	115.1	0.0511039	6.86274	92.3981	0.68805
481	A	C	152	functional	120	0.00601323	1.47139	98.1216	0.401001
482	A	G	152	functional	87.5	0.137173	6.77667	91.2393	1.84686
483	A	T	152	functional	134.05	0.00651998	3.5506	96.2661	0.176774
484	A	C	153	functional	102.2	0.313913	12.6969	84.8904	2.09879
486	A	T	153	functional	102.2	0.313913	12.6969	84.8904	2.09879
489	C	A	154	functional	127.8	0.358535	7.95873	87.7305	3.95219
490	C	G	154	functional	87.5	0.297399	17.9452	80.4246	1.33285
493	A	C	155	functional	91.7	2.13495	42.8816	52.3758	2.60764
494	A	G	155	functional	121.05	0.294286	8.81801	87.9524	2.93526
495	A	T	155	functional	109.6	0.631137	56.8131	42.0882	0.467558
496	A	C	156	functional	110.55	0.240668	9.73438	87.8529	2.17203
498	A	T	156	functional	110.55	0.240668	9.73438	87.8529	2.17203
499	T	A	157	partially functional	49.5	2.34198	94.7268	2.8605	0.0707217
500	T	C	157	partially functional	49.5	2.34198	94.7268	2.8605	0.0707217
501	T	G	157	partially functional	49.85	0.118567	96.3243	3.55275	0.00437312
503	G	C	158	partially functional	51.1	1.96784	97.2159	0.800062	0.0161948
504	G	T	158	functional	100.45	1.08246	97.4401	1.46117	0.0162321
507	G	C	159	partially functional	70.35	0.0388207	94.7458	5.21322	0.00213604
508	G	T	159	partially functional	70.35	0.0388207	94.7458	5.21322	0.00213604
512	T	A	160	functional	96.45	0.446781	16.3514	80.9889	2.21292
513	T	C	160	functional	98.95	0.0343397	6.8795	92.6238	0.46234
514	T	G	160	partially functional	71.8	1.40263	25.4915	69.2931	3.81273
515	T	A	161	partially functional	74.6	0.23992	19.5417	79.2455	0.972924
516	T	C	161	partially functional	53.3	1.0408	84.7741	14.0131	0.172043
517	T	G	161	partially functional	68.7	1.47867	36.2754	59.808	2.43791
518	C	A	162	functional	98.95	0.0343397	6.8795	92.6238	0.46234
519	C	G	162	functional	98.95	0.0343397	6.8795	92.6238	0.46234
523	A	C	163	functional	107.85	1.57365	31.6076	63.6498	3.16894
524	A	G	163	functional	111.75	0.517401	10.3923	84.8651	4.22519
525	A	T	163	partially functional	73.35	0.118628	11.8017	87.2032	0.876552
526	C	A	164	functional	111.75	NA	NA	NA	NA
527	C	G	164	partially functional	73.35	0.118628	11.8017	87.2032	0.876552
528	C	T	164	functional	93.85	0.6151	30.3875	67.6285	1.36893
532	G	A	166	partially functional	65.4	0.611481	13.5736	82.1156	3.69924
533	G	C	166	functional	124.65	0.333281	16.4649	81.5511	1.65075
535	A	C	167	functional	119.95	0.888355	24.0856	72.3572	2.66876
536	A	G	167	functional	122.05	0.611481	13.5736	82.1156	3.69924
537	A	T	167	functional	105.7	1.60129	43.4153	53.0276	1.95582
538	A	C	168	functional	80.25	0.174175	12.8367	85.8246	1.16452
540	A	T	168	functional	80.25	0.174175	12.8367	85.8246	1.16452
543	G	A	169	functional	106.5	0.051668	5.68075	93.4179	0.849662
544	G	C	169	functional	118.8	0.126488	3.79008	92.9804	3.10306
545	G	T	169	functional	119.4	0.0946087	3.46251	93.8778	2.56509
546	A	C	170	non-functional	15.45	0.0475019	3.86907	94.9181	1.16534
547	A	G	170	functional	121.45	0.0217984	1.96223	96.9391	1.0769
548	A	T	170	functional	112.15	0.247109	5.48531	90.204	4.06362
549	C	A	171	functional	105.75	0.110518	9.00178	89.7854	1.10233
550	C	G	171	functional	105.75	0.110518	9.00178	89.7854	1.10233
552	C	A	172	functional	96.75	0.102145	6.8117	91.7109	1.37526
553	C	G	172	functional	87.25	0.0173922	5.19796	94.4686	0.316089
554	C	T	172	partially functional	59.05	0.110518	9.00178	89.7854	1.10233
555	C	A	173	functional	84.5	0.112073	7.47374	91.0489	1.36533
556	C	G	173	functional	109.2	0.0476189	3.5095	95.1518	1.29107
557	C	T	173	functional	108.25	0.384971	11.5353	85.2351	2.84458
562	G	A	175	partially functional	69.25	0.328114	17.9144	80.2869	1.47051
563	G	C	175	functional	100.15	0.219853	8.89244	88.6949	2.19285
564	G	T	175	functional	115.95	0.221214	8.09606	89.2442	2.43848
566	G	A	176	functional	87.5	0.0920041	7.49381	91.2933	1.12084
567	G	C	176	functional	100.9	0.177855	10.7318	87.6379	1.45239
568	G	T	176	functional	117.7	0.203735	16.5944	82.1927	1.00911
572	C	A	178	functional	81.4	0.148553	8.96374	89.406	1.4817
573	C	G	178	functional	110.9	NA	NA	NA	NA
574	C	T	178	partially functional	73.5	0.144574	11.7757	87.0114	1.06827
575	C	A	179	functional	106	0.135592	8.18168	90.1881	1.49466
576	C	G	179	functional	105	0.0698175	5.14554	93.5158	1.26887
577	C	T	179	functional	114.85	0.23992	19.5417	79.2455	0.972924
581	G	A	181	functional	111.7	0.617051	12.3938	82.8636	4.12554
582	G	C	181	functional	130	0.0306428	8.28663	91.3449	0.337781
583	G	T	181	functional	135.05	0.149596	8.16767	90.0337	1.64902
584	A	C	182	functional	110.25	0.165017	8.15225	89.8637	1.81901
585	A	G	182	functional	124.05	NA	NA	NA	NA
586	A	T	182	functional	122.6	0.174175	12.8367	85.8246	1.16452
587	T	A	183	functional	93.35	0.310388	13.8747	83.9372	1.87774
589	T	G	183	functional	93.35	0.310388	13.8747	83.9372	1.87774
592	G	A	184	functional	108.55	0.151284	6.76256	91.0493	2.03684
593	G	C	184	functional	105.3	0.120982	9.85407	88.9331	1.09186
595	A	C	185	functional	106	NA	NA	NA	NA
596	A	G	185	functional	107.05	0.0391693	3.19038	95.5968	1.17367
597	A	T	185	non-functional	5.35	0.148553	8.96374	89.406	1.4817
598	A	C	186	functional	98.9	0.575043	6.3388	85.3439	7.74223
600	A	T	186	functional	98.9	0.575043	6.3388	85.3439	7.74223
601	G	A	187	functional	86.95	0.187342	15.2592	83.528	1.0255
602	G	C	187	functional	88.65	0.259749	21.1568	77.6304	0.953095
603	G	T	187	partially functional	67.65	0.259749	21.1568	77.6304	0.953095
605	C	A	188	functional	88.2	0.221254	18.0213	80.7659	0.99159
606	C	G	188	functional	75.3	0.270786	6.64306	89.4404	3.64579
607	C	T	188	functional	81	0.187342	15.2592	83.528	1.0255
613	C	A	190	functional	82.25	0.125433	5.60699	92.2049	2.06269
614	C	G	190	partially functional	58.45	0.0634886	4.6791	93.9822	1.2752
615	C	T	190	functional	108.05	0.100875	8.21639	90.5708	1.11197
616	C	A	191	functional	97.7	0.0856996	3.83087	93.981	2.10243
617	C	G	191	functional	95.8	0.0580873	3.17146	95.0299	1.74053
618	C	T	191	functional	97.85	0.110518	9.00178	89.7854	1.10233
624	A	G	193	functional	88.95	0.517401	10.3923	84.8651	4.22519
626	G	A	194	functional	99.5	0.476781	7.84049	86.4271	5.25564
627	G	C	194	functional	85.2	0.745836	12.265	82.0026	4.98658
628	G	T	194	functional	89.15	0.520234	9.45481	85.3298	4.69512
629	A	C	195	functional	105.4	0.81315	13.372	80.8956	4.91927
631	A	T	195	functional	105.4	0.81315	13.372	80.8956	4.91927
633	A	C	196	functional	95.6	0.56533	11.355	83.9025	4.17726
634	A	G	196	functional	102.9	0.433775	7.88349	86.9011	4.78158
635	A	T	196	functional	95.6	0.56533	11.355	83.9025	4.17726
636	T	A	197	functional	91.35	1.43161	23.5424	70.7252	4.3008
637	T	C	197	partially functional	57.5	0.997826	22.1497	73.5396	3.3129
638	T	G	197	functional	87.15	1.32691	21.8206	72.447	4.4055
639	G	A	198	functional	91.05	0.432159	8.68014	86.5773	4.31043
640	G	C	198	functional	91.05	0.432159	8.68014	86.5773	4.31043
641	G	T	198	functional	91.05	0.432159	8.68014	86.5773	4.31043
643	C	A	199	functional	93.1	0.466867	11.4534	84.63	3.44971
644	C	G	199	functional	90.25	0.325752	7.99152	88.0919	3.59082
645	C	T	199	functional	92.9	0.185131	5.54729	91.2232	3.04442
646	C	A	200	functional	100.1	0.234016	12.7768	85.4245	1.56461
647	C	G	200	functional	88	0.492392	16.3058	80.763	2.43883
648	C	T	200	functional	94.6	0.53473	17.7078	79.361	2.39649
654	G	A	202	functional	88.3	0.885459	14.5611	79.7065	4.84696
655	G	C	202	functional	97.15	1.07606	13.1091	79.3051	6.50976
657	A	C	203	functional	93.75	0.522355	8.58994	85.6776	5.21006
658	A	G	203	functional	118.05	0.951414	17.2911	77.4935	4.26394
659	A	T	203	functional	110.05	1.65696	27.2481	67.0195	4.07546
661	G	C	204	functional	89.6	0.39068	9.58437	86.4991	3.52589
662	G	T	204	functional	89.6	0.39068	9.58437	86.4991	3.52589
665	G	A	205	functional	90.45	1.60038	21.5471	71.539	5.31346
666	G	C	205	functional	75.25	0.997826	22.1497	73.5396	3.3129
667	G	T	205	functional	80.9	1.11695	20.2996	74.4851	4.09841
669	C	A	206	partially functional	70.35	0.664233	24.3098	73.0305	1.99547
670	C	G	206	functional	83.3	1.07656	23.8974	71.7918	3.23417
671	C	T	206	functional	106.75	1.61689	29.3857	65.399	3.59846
675	G	A	208	functional	90.35	0.520234	9.45481	85.3298	4.69512
676	G	C	208	functional	91.25	0.104267	2.82696	93.6159	3.45285
677	G	T	208	functional	81.15	0.39633	5.33609	87.7501	6.51751
678	C	A	209	functional	76.6	0.520234	9.45481	85.3298	4.69512
679	C	G	209	functional	95.2	0.352333	10.5573	86.2131	2.87721
680	C	T	209	functional	92.65	0.876084	15.9221	78.8626	4.33927
689	C	A	211	partially functional	68.4	0.153338	4.15739	92.2855	3.40378
690	C	G	211	functional	85.25	0.0527692	2.60693	95.409	1.93126
691	C	T	211	partially functional	72.65	NA	NA	NA	NA
692	C	A	212	functional	82.65	0.429997	9.54505	86.1442	3.88073
693	C	G	212	partially functional	65.4	0.354824	9.62022	86.8227	3.20229
694	C	T	212	partially functional	73.05	0.324135	8.78816	87.6547	3.23298
717	G	A	217	functional	92.4	0.185747	3.73083	91.5266	4.55684
718	G	C	217	functional	87.7	0.325752	7.99152	88.0919	3.59082
719	G	T	217	functional	87.7	0.325752	7.99152	88.0919	3.59082
721	T	A	218	functional	88	0.0240854	1.60616	96.9164	1.45332
722	T	C	218	functional	92.85	0.298037	6.61581	89.0735	4.01269
723	T	G	218	functional	81.05	0.429997	9.54505	86.1442	3.88073
729	G	A	220	partially functional	27.7	0.621686	11.2986	83.486	4.59367
730	G	C	220	functional	107.65	0.876084	15.9221	78.8626	4.33927
731	G	T	220	partially functional	70.35	0.754278	10.1554	82.9308	6.15956
732	C	A	221	functional	79.3	0.0938045	1.70482	93.0798	5.12155
733	C	G	221	functional	87.2	0.560862	12.45	83.2393	3.74986
734	C	T	221	functional	82.8	1.03168	18.7499	76.0347	4.18367
738	C	A	223	functional	85.75	1.68051	33.7539	61.5035	3.06208
739	C	G	223	functional	92.4	1.52748	33.9069	61.7824	2.78325
740	C	T	223	functional	96.1	1.43035	31.7509	63.9384	2.88037
741	C	A	224	functional	103.25	1.57365	31.6076	63.6498	3.16894
742	C	G	224	functional	118.35	0.824575	30.178	67.1623	1.83512
743	C	T	224	non-functional	7.9	1.45383	43.5628	53.2077	1.77571
749	G	A	226	functional	90.4	0.12288	8.19439	90.3282	1.35452
750	G	C	226	functional	79.3	1.73052	31.4507	63.3339	3.48484
751	G	T	226	functional	85.8	0.617051	12.3938	82.8636	4.12554
752	C	A	227	functional	86.7	0.724123	16.074	79.6152	3.5866
753	C	G	227	functional	107.8	0.509579	12.5013	83.5822	3.40699
754	C	T	227	partially functional	71.9	0.203909	5.52851	90.9144	3.35321
759	C	A	229	functional	92.65	0.0573008	5.15806	93.7433	1.04139
760	C	G	229	functional	97.7	0.234016	12.7768	85.4245	1.56461
761	C	T	229	functional	82.95	0.189895	13.9952	84.6661	1.1488
762	C	A	230	functional	99.6	0.277824	15.1687	83.0327	1.5208
763	C	G	230	functional	88.35	0.477271	19.3043	78.283	1.93543
764	C	T	230	functional	114.4	0.334325	24.6397	74.0216	1.00437
769	G	A	232	functional	111.3	0.689659	9.28539	83.8008	6.22418
770	G	C	232	functional	110	1.65696	27.2481	67.0195	4.07546
771	G	T	232	functional	107.6	0.683321	11.237	83.0306	5.0491
772	C	A	233	functional	93.85	0.0946652	2.83656	93.9339	3.13488
773	C	G	233	functional	99.3	0.796667	16.0015	79.2559	3.94592
774	C	T	233	functional	109.65	0.82415	11.0961	81.99	6.08969
779	G	A	235	functional	76.15	0.683321	11.237	83.0306	5.0491
780	G	C	235	functional	92.6	3.45692	46.5431	46.5431	3.45692
781	G	T	235	functional	82.55	1.11695	20.2996	74.4851	4.09841
783	C	A	236	functional	105.95	1.1803	32.0009	64.442	2.37682
784	C	G	236	functional	97.05	1.40263	25.4915	69.2931	3.81273
785	C	T	236	functional	106.1	1.54168	25.3525	68.9151	4.19073
791	C	A	238	functional	85.25	1.43035	31.7509	63.9384	2.88037
792	C	G	238	functional	96.3	0.824575	30.178	67.1623	1.83512
793	C	T	238	functional	84.95	0.906589	22.2409	73.8425	3.00998
794	C	A	239	functional	89.25	0.765417	41.7903	56.411	1.0332
795	C	G	239	functional	106.75	1.37436	41.1814	55.5891	1.85519
796	C	T	239	functional	106.45	1.95582	53.0276	43.4153	1.60129
801	A	C	241	functional	91.55	1.0157	20.4008	74.8566	3.72689
802	A	G	241	functional	105.05	0.0940944	4.64849	93.3675	1.88994
803	A	T	241	partially functional	63.75	0.683321	11.237	83.0306	5.0491
804	C	A	242	functional	110.7	0.951414	17.2911	77.4935	4.26394
805	C	G	242	functional	106.9	1.11695	20.2996	74.4851	4.09841
806	C	T	242	functional	102.8	0.76181	20.6547	75.7882	2.79531
813	C	A	244	functional	99.3	0.726047	32.4552	65.3567	1.46208
814	C	G	244	functional	98.85	0.402436	32.7788	66.0084	0.810407
815	C	T	244	functional	86.9	0.854926	34.5794	63.0079	1.55778
816	C	A	245	functional	93.65	0.632479	28.2726	69.5393	1.55565
817	C	G	245	functional	86.2	0.882521	32.2987	65.0416	1.77718
818	C	T	245	functional	76.15	0.224876	16.5733	82.088	1.11382
825	G	A	247	partially functional	68.3	1.04574	17.1968	77.0708	4.68668
826	G	C	247	functional	76.55	2.58054	42.4361	51.8315	3.15188
827	G	T	247	functional	102.5	0.93816	18.8435	76.414	3.80443
828	C	A	248	functional	78.95	1.15933	25.7348	69.9545	3.15139
829	C	G	248	functional	93.85	1.30248	23.6715	71.1131	3.91287
830	C	T	248	functional	100.5	0.22482	4.08591	90.6987	4.99054
834	G	A	250	functional	75.45	0.876084	15.9221	78.8626	4.33927
835	G	C	250	functional	105.3	2.73795	49.76	45.0247	2.4774
836	G	T	250	partially functional	61.1	1.60038	21.5471	71.539	5.31346
837	C	A	251	partially functional	63.6	1.84803	33.5863	61.1983	3.36733
838	C	G	251	functional	102.25	1.65696	27.2481	67.0195	4.07546
839	C	T	251	functional	94.05	0.933502	27.9715	68.7989	2.29604
848	C	A	253	functional	104.05	1.47867	36.2754	59.808	2.43791
849	C	G	253	functional	88.65	0.882521	32.2987	65.0416	1.77718
850	C	T	253	functional	91.45	0.632479	28.2726	69.5393	1.55565
851	C	A	254	partially functional	45.45	1.86045	45.6416	50.4418	2.05612
852	C	G	254	functional	109	1.45383	43.5628	53.2077	1.77571
853	C	T	254	functional	99.45	2.24985	55.1944	40.889	1.66673
858	G	A	256	functional	111.15	0.53473	17.7078	79.361	2.39649
859	G	C	256	functional	93.35	1.57365	31.6076	63.6498	3.16894
860	G	T	256	partially functional	68.65	0.865169	17.3774	77.88	3.87742
861	C	A	257	functional	105.45	1.27548	25.6187	69.6387	3.46711
862	C	G	257	functional	86	0.449187	24.5248	73.6766	1.34943
863	C	T	257	functional	91.9	0.972616	32.2086	64.8602	1.95861
868	C	A	259	functional	95.4	0.749052	37.005	61.011	1.23498
869	C	G	259	functional	87	0.854926	34.5794	63.0079	1.55778
870	C	T	259	functional	102.8	0.415029	30.5875	68.0738	0.923663
871	C	A	260	functional	79.45	1.57177	38.5595	57.524	2.3448
872	C	G	260	functional	100.35	1.86045	45.6416	50.4418	2.05612
873	C	T	260	functional	98.6	1.93349	57.9353	38.8352	1.29606
878	G	A	262	functional	90.45	1.85942	25.0347	68.0514	5.05442
879	G	C	262	functional	100.55	2.37018	52.6132	43.0761	1.94054
880	G	T	262	partially functional	58.35	0.788327	26.1058	70.963	2.1429
881	C	A	263	partially functional	68.5	0.327574	39.8037	59.3801	0.488683
882	C	G	263	functional	102.85	1.61689	29.3857	65.399	3.59846
883	C	T	263	functional	100	0.774761	19.0069	77.0766	3.14181
891	C	A	265	functional	97.1	0.00365306	1.47375	98.279	0.243609
892	C	G	265	functional	111.4	0.0418965	6.87195	92.5221	0.564084
893	C	T	265	functional	93.15	0.0754926	7.51033	91.4945	0.919688
894	C	A	266	non-functional	0	0.384971	11.5353	85.2351	2.84458
895	C	G	266	functional	114.7	0.384971	11.5353	85.2351	2.84458
896	C	T	266	functional	108.35	0.55557	13.6295	82.4539	3.361
903	T	A	268	functional	81.9	1.0157	20.4008	74.8566	3.72689
904	T	C	268	functional	94.6	0.108571	10.8011	88.2037	0.886609
905	T	G	268	functional	86.55	0.714483	17.5281	78.5554	3.20209
906	C	A	269	functional	106.8	0.98502	44.0316	53.7803	1.20311
907	C	G	269	functional	95.7	1.79052	35.9635	59.2939	2.95207
908	C	T	269	functional	99.2	2.01824	40.5375	54.7199	2.72434
914	T	A	271	partially functional	47.2	4.58942	92.181	3.07638	0.153164
915	T	C	271	partially functional	47.2	4.58942	92.181	3.07638	0.153164
916	T	G	271	partially functional	69.35	4.61645	92.7239	2.53356	0.126139
918	G	C	272	partially functional	63.65	1.18878	96.8272	1.95997	0.0240632
919	G	T	272	functional	104	2.24589	90.8403	6.74703	0.16681
923	G	C	273	functional	94.65	4.63881	93.1731	2.08435	0.103774
924	G	T	273	functional	94.65	4.63881	93.1731	2.08435	0.103774
927	C	A	274	functional	92.4	0.328704	72.7772	26.7732	0.120923
928	C	G	274	non-functional	9.25	1.01937	67.9781	30.5445	0.458033
929	C	T	274	functional	105.05	0.580318	70.5146	28.6691	0.23594
930	C	A	275	functional	103.9	2.66876	72.3572	24.0856	0.888355
931	C	G	275	functional	127.85	1.81015	73.2159	24.3714	0.602548
932	C	T	275	functional	120.05	1.44282	78.7756	19.4258	0.355796
936	C	A	277	functional	82.5	0.956657	25.9375	70.5054	2.60046
937	C	G	277	functional	87.95	1.26044	34.1739	62.269	2.29668
940	T	A	278	functional	85.55	1.89091	69.204	28.1363	0.768787
941	T	C	278	partially functional	71.25	0.24063	87.8391	11.8877	0.0325658
942	T	G	278	functional	131.85	2.60046	70.5054	25.9375	0.956657
947	T	A	280	functional	128.95	0.352636	35.0817	63.9231	0.642544
948	T	C	280	functional	92.95	3.5682	58.6777	35.5898	2.16422
949	T	G	280	functional	135.5	1.7772	29.2254	65.0422	3.95522
952	C	T	281	functional	104.15	4.13923	55.7295	37.3566	2.77461
957	T	A	283	functional	97.55	0.703029	34.7313	63.2846	1.281
958	T	C	283	functional	100.5	0.229329	62.0166	37.615	0.139095
959	T	G	283	functional	97.45	1.61689	29.3857	65.399	3.59846
960	C	A	284	functional	98.35	1.44445	58.4243	39.163	0.968247
961	C	G	284	functional	91.7	1.14872	51.3492	46.4627	1.03941
962	C	T	284	partially functional	46.5	1.38596	56.0583	41.529	1.02674
968	T	A	286	partially functional	44.05	0.132395	19.6492	79.6815	0.53689
969	T	C	286	partially functional	30.55	1.94054	43.0761	52.6132	2.37018
970	T	G	286	partially functional	23.9	0.217339	19.5643	79.337	0.881355
971	C	A	287	functional	94.3	0.342244	13.8429	83.7444	2.07046
972	C	G	287	functional	88.15	0.726047	32.4552	65.3567	1.46208
973	C	T	287	partially functional	39.4	0.114425	4.62816	92.9591	2.29828
977	G	A	289	functional	80.05	0.231253	13.9539	84.4159	1.399
978	G	C	289	partially functional	70.4	0.573485	28.3316	69.6844	1.41055
979	G	T	289	functional	82.75	1.03941	46.4627	51.3492	1.14872
980	T	A	290	non-functional	14.75	3.15139	69.9545	25.7348	1.15933
981	T	C	290	partially functional	53.15	16.6043	40.84	30.255	12.3008
982	T	G	290	non-functional	18.45	4.91539	66.1796	26.9066	1.99845
986	C	A	292	non-functional	8	1.59965	71.5062	26.3057	0.588478
987	C	G	292	partially functional	20.65	1.50975	67.4877	30.3242	0.678375
988	C	T	292	non-functional	15.4	1.55565	69.5393	28.2726	0.632479
989	C	A	293	non-functional	13.95	1.64166	73.3843	24.4275	0.546463
990	C	G	293	partially functional	20.05	1.64166	73.3843	24.4275	0.546463
991	C	T	293	partially functional	21.25	1.18515	79.0332	19.4894	0.292254
997	T	A	295	partially functional	66.85	1.52748	33.9069	61.7824	2.78325
998	T	C	295	partially functional	24	1.36202	60.8839	36.928	0.826107
999	T	G	295	partially functional	23.05	1.33643	29.6661	66.0232	2.97429
1000	C	A	296	partially functional	32.6	1.18781	58.681	39.335	0.796216
1001	C	G	296	functional	85.65	2.05612	50.4418	45.6416	1.86045
1002	C	T	296	partially functional	27.7	1.13971	56.3045	41.7114	0.844319
1007	C	A	298	functional	93.65	1.13396	18.6476	75.6199	4.59845
1008	C	G	298	functional	83.05	0.923207	20.4933	75.196	3.38752
1010	A	C	299	partially functional	31.65	3.48484	63.3339	31.4507	1.73052
1011	A	G	299	partially functional	33.25	1.30248	23.6715	71.1131	3.91287
1012	A	T	299	partially functional	41.65	2.4774	45.0247	49.76	2.73795
1014	G	C	300	partially functional	59.35	1.22768	20.1888	74.0788	4.50473
1015	G	T	300	partially functional	59.35	1.22768	20.1888	74.0788	4.50473
1017	A	C	301	partially functional	31.85	1.18441	23.7896	71.4678	3.55817
1018	A	G	301	functional	93.45	0.133578	26.7606	72.7428	0.363102
1020	A	C	302	functional	111.1	0.184212	49.8158	49.8158	0.184212
1021	A	G	302	functional	91.25	0.93816	18.8435	76.414	3.80443
1022	A	T	302	partially functional	42.35	1.36202	60.8839	36.928	0.826107
1023	A	C	303	partially functional	25.3	0.823385	22.3241	74.1187	2.73373
1025	A	T	303	partially functional	25.3	0.823385	22.3241	74.1187	2.73373
1028	A	C	304	partially functional	61.95	3.95522	65.0422	29.2254	1.7772
1029	A	G	304	partially functional	22	2.30049	37.8307	56.4368	3.43193
1030	A	T	304	functional	86.65	1.83446	40.7213	54.968	2.47626
1031	C	A	305	functional	78.65	0.693765	41.862	56.5078	0.936485
1032	C	G	305	functional	86.65	1.83446	40.7213	54.968	2.47626
1033	C	T	305	functional	86.05	1.90326	38.228	57.0294	2.83933
1039	T	A	307	partially functional	60.6	1.78896	79.9685	17.8434	0.39917
1040	T	C	307	partially functional	73.85	1.6647	67.3327	30.2546	0.747999
1041	T	G	307	partially functional	73.85	2.09879	84.8904	12.6969	0.313913
1042	A	C	308	partially functional	39.95	1.96986	88.0551	9.75678	0.218267
1043	A	G	308	partially functional	65.5	4.78158	86.9011	7.88349	0.433775
1044	A	T	308	partially functional	68.8	1.57365	31.6076	63.6498	3.16894
1051	C	A	310	functional	86.25	1.1614	15.6368	77.4494	5.75244
1052	C	G	310	functional	80.7	0.805591	14.6409	80.1437	4.40976
1054	A	C	311	partially functional	71.3	0.0514271	30.9511	68.883	0.114453
1055	A	G	311	partially functional	74.3	1.11695	20.2996	74.4851	4.09841
1056	A	T	311	functional	77.9	2.25283	45.2493	50.0082	2.48976
1059	G	C	312	partially functional	43.25	0.805591	14.6409	80.1437	4.40976
1060	G	T	312	partially functional	43.25	0.805591	14.6409	80.1437	4.40976
1062	G	A	313	non-functional	15	1.41055	69.6844	28.3316	0.573485
1063	G	C	313	non-functional	13.65	3.80443	76.414	18.8435	0.93816
1064	G	T	313	non-functional	13.8	27.1281	54.6293	12.1895	6.0531
1065	G	A	314	partially functional	20.1	3.83033	62.9884	31.2791	1.90209
1066	G	C	314	partially functional	33.5	2.2283	66.7691	30.0013	1.00124
1067	G	T	314	non-functional	7.9	4.33927	78.8626	15.9221	0.876084
1076	A	C	316	partially functional	47.25	0.294286	8.81801	87.9524	2.93526
1077	A	G	316	functional	75.6	0.739804	13.4453	81.3393	4.47555
1078	A	T	316	functional	83.05	1.21929	36.5348	60.2357	2.01026
1081	G	A	317	partially functional	38.8	0.0434131	1.94062	95.8713	2.14471
1082	G	C	317	partially functional	32.05	0.132317	10.7774	88.0098	1.08053
1083	G	T	317	partially functional	65.35	1.13396	18.6476	75.6199	4.59845
1084	C	A	318	partially functional	47.25	0.294286	8.81801	87.9524	2.93526
1085	C	G	318	partially functional	47.25	0.294286	8.81801	87.9524	2.93526
1090	T	A	319	partially functional	21.15	3.87742	77.88	17.3774	0.865169
1091	T	C	319	partially functional	64.95	0.154406	68.843	30.9332	0.069379
1092	T	G	319	non-functional	10.2	1.56461	85.4245	12.7768	0.234016
1093	A	C	320	non-functional	18.35	4.26951	85.7554	9.50197	0.473075
1094	A	G	320	partially functional	60.2	3.59082	88.0919	7.99152	0.325752
1095	A	T	320	functional	75.05	1.90209	31.2791	62.9884	3.83033
1104	G	A	322	partially functional	46.55	2.37129	47.6287	47.6287	2.37129
1105	G	C	322	partially functional	73.85	2.58078	57.288	38.4013	1.72995
1106	G	T	322	partially functional	50	3.46711	69.6387	25.6187	1.27548
1107	G	A	323	non-functional	18.45	0.12978	21.2867	78.1073	0.4762
1108	G	C	323	partially functional	53.1	1.46561	48.5344	48.5344	1.46561
1109	G	T	323	partially functional	28.9	3.27226	65.7252	29.5322	1.47032
1116	T	A	325	non-functional	13.5	2.83933	57.0294	38.228	1.90326
1117	T	C	325	partially functional	29	4.78377	47.7142	43.1736	4.32853
1118	T	G	325	non-functional	0	2.78449	68.3105	27.773	1.13209
1119	T	A	326	non-functional	19	6.46413	28.9702	52.7872	11.7784
1120	T	C	326	non-functional	9.9	1.80324	89.0845	8.93151	0.180791
1121	T	G	326	non-functional	13.15	4.22519	84.8651	10.3923	0.517401
1122	C	A	327	partially functional	29	4.78377	47.7142	43.1736	4.32853
1123	C	G	327	partially functional	29	4.78377	47.7142	43.1736	4.32853
1128	C	A	328	non-functional	10.55	0.854382	46.6477	51.5537	0.944239
1129	C	G	328	non-functional	17.1	1.77571	53.2077	43.5628	1.45383
1130	C	T	328	non-functional	19.35	2.66876	72.3572	24.0856	0.888355
1132	G	A	329	partially functional	55	0.473075	9.50197	85.7554	4.26951
1133	G	C	329	non-functional	9.2	2.02247	66.975	30.0938	0.908754
1134	G	T	329	non-functional	12.55	9.57696	42.921	38.8365	8.66559
1139	C	A	331	partially functional	31.7	2.04014	24.854	67.5602	5.54568
1140	C	G	331	partially functional	64.9	0.429763	35.0046	63.7826	0.78308
1142	T	A	332	non-functional	9.1	2.52893	68.566	27.8769	1.02819
1143	T	C	332	non-functional	8.25	5.0491	83.0306	11.237	0.683321
1144	T	G	332	non-functional	7.2	3.81273	69.2931	25.4915	1.40263
1153	G	A	334	partially functional	59.25	1.27873	69.8162	28.3852	0.519892
1154	G	C	334	functional	76.25	0.108978	80.1094	19.7547	0.0268737
1155	G	T	334	partially functional	37.35	4.26394	77.4935	17.2911	0.951414
1156	G	A	335	partially functional	39.3	0.493894	66.3249	32.936	0.24526
1157	G	C	335	partially functional	66.75	1.01937	67.9781	30.5445	0.458033
1158	G	T	335	partially functional	72.95	0.749923	82.4519	16.6468	0.151407
1164	T	A	337	non-functional	7.9	1.75489	58.1139	38.9549	1.17634
1165	T	C	337	non-functional	19.85	2.48976	50.0082	45.2493	2.25283
1166	T	G	337	non-functional	6.75	3.37174	67.7232	27.5342	1.37085
1169	T	A	338	partially functional	21.9	2.03125	33.4031	60.8645	3.70117
1170	T	C	338	non-functional	9.6	2.93526	87.9524	8.81801	0.294286
1171	T	G	338	non-functional	10.1	6.15956	82.9308	10.1554	0.754278
1173	C	A	339	non-functional	19.85	2.48976	50.0082	45.2493	2.25283
1174	C	G	339	non-functional	19.85	2.48976	50.0082	45.2493	2.25283
1176	T	A	340	functional	81.8	0.956657	25.9375	70.5054	2.60046
1178	T	G	340	functional	104.1	1.84803	33.5863	61.1983	3.36733
1181	T	C	341	functional	79.1	2.30346	76.28	20.7887	0.627765
1182	T	G	341	partially functional	65.7	1.46208	65.3567	32.4552	0.726047
1184	G	C	342	functional	91.05	1.84803	33.5863	61.1983	3.36733
1185	G	T	342	functional	91.05	1.84803	33.5863	61.1983	3.36733
1187	C	A	343	functional	97.3	1.24602	27.659	68.0302	3.06471
1188	C	G	343	supertrans	143.2	0.847271	28.0578	69.011	2.08395
1189	C	T	343	functional	81.05	1.26341	46.2387	51.1016	1.39629
1191	A	C	344	functional	114.45	3.81273	69.2931	25.4915	1.40263
1192	A	G	344	functional	97	0.868559	26.0256	70.7449	2.36099
1193	A	T	344	functional	92.45	1.93349	57.9353	38.8352	1.29606
1194	T	A	345	functional	99.1	0.0473046	14.1378	85.5287	0.286176
1196	T	G	345	functional	99.1	0.0473046	14.1378	85.5287	0.286176
1198	T	A	346	functional	92.9	2.44988	32.9845	60.1017	4.46397
1199	T	C	346	non-functional	12.65	1.65555	60.5904	36.7499	1.00414
1200	T	G	346	functional	104.25	5.65566	25.3469	56.4106	12.5869
1201	C	A	347	partially functional	68.25	2.83933	57.0294	38.228	1.90326
1202	C	G	347	partially functional	23.45	2.48976	50.0082	45.2493	2.25283
1203	C	T	347	functional	90.65	2.24985	55.1944	40.889	1.66673
1209	G	A	349	partially functional	59.85	2.35138	77.867	19.2018	0.579843
1210	G	C	349	partially functional	59.85	2.35138	77.867	19.2018	0.579843
1211	G	T	349	non-functional	17.4	2.54985	84.4393	12.6295	0.381377
1212	G	A	350	partially functional	32.55	1.05036	70.0446	28.478	0.427044
1213	G	C	350	partially functional	48.95	2.70233	66.2951	29.7883	1.21424
1214	G	T	350	non-functional	19.35	3.94592	79.2559	16.0015	0.796667
1220	A	C	352	non-functional	14.5	5.23402	63.7634	28.6508	2.3518
1221	A	G	352	functional	88.8	2.77461	37.3566	55.7295	4.13923
1222	A	T	352	functional	86.6	1.66673	40.889	55.1944	2.24985
1223	C	A	353	functional	83.7	2.48976	50.0082	45.2493	2.25283
1224	C	G	353	partially functional	74.4	3.80147	51.1819	41.9042	3.11238
1225	C	T	353	functional	78.05	1.57177	38.5595	57.524	2.3448
1230	G	A	355	functional	97.35	1.14437	34.29	62.4805	2.08518
1231	G	C	355	partially functional	36.75	4.30359	57.9423	35.1438	2.61026
1232	G	T	355	functional	92.4	1.26044	34.1739	62.269	2.29668
1233	C	A	356	non-functional	14.45	2.43947	40.1163	54.1513	3.29294
1234	C	G	356	partially functional	52.15	1.96901	35.7851	58.9996	3.24635
1235	C	T	356	partially functional	41.2	2.61026	35.1438	57.9423	4.30359
1244	A	C	358	non-functional	14.7	1.96901	35.7851	58.9996	3.24635
1245	A	G	358	non-functional	10.2	1.42752	38.7037	57.7392	2.1296
1247	A	C	359	non-functional	17	1.11957	61.1264	37.075	0.679053
1248	A	G	359	partially functional	68	3.15345	25.7516	63.3387	7.75623
1249	A	T	359	non-functional	11.4	3.70117	60.8645	33.4031	2.03125
1251	G	C	360	non-functional	15.95	1.51376	41.042	55.4009	2.04336
1252	G	T	360	non-functional	15.95	1.51376	41.042	55.4009	2.04336
1254	T	A	361	functional	82.75	1.03866	34.3957	62.6731	1.89256
1255	T	C	361	non-functional	19	2.43791	59.808	36.2754	1.47867
1256	T	G	361	partially functional	73.15	2.14347	28.8591	64.2271	4.77037
1258	C	A	362	functional	98.9	2.83933	57.0294	38.228	1.90326
1259	C	G	362	functional	91.7	4.36639	48.1315	43.5512	3.95088
1260	C	T	362	functional	106.95	0.769001	56.6753	41.9861	0.56969
1266	G	A	364	partially functional	36.1	2.03125	33.4031	60.8645	3.70117
1267	G	C	364	non-functional	19.2	1.65696	27.2481	67.0195	4.07546
1268	G	T	364	non-functional	19.2	1.65696	27.2481	67.0195	4.07546
1270	T	A	365	partially functional	39.35	3.37174	67.7232	27.5342	1.37085
1271	T	C	365	non-functional	10.55	0.384466	57.0598	42.2709	0.284819
1272	T	G	365	non-functional	6.9	3.70785	67.3871	27.3975	1.5075
1279	A	C	367	non-functional	8.4	1.61169	53.3717	43.6971	1.31954
1280	A	G	367	functional	122.65	1.43161	23.5424	70.7252	4.3008
1281	A	T	367	functional	128.65	0.768787	28.1363	69.204	1.89091
1282	C	A	368	functional	99.25	0.449187	24.5248	73.6766	1.34943
1283	C	G	368	functional	128.65	0.768787	28.1363	69.204	1.89091
1284	C	T	368	partially functional	49.6	0.683321	11.237	83.0306	5.0491
1291	T	A	370	functional	92.45	0.574346	85.2405	14.0902	0.0949388
1292	T	C	370	non-functional	14.6	1.66218	90.752	7.44938	0.13644
1293	T	G	370	partially functional	27.05	2.77143	83.0435	13.727	0.458115
1294	G	A	371	functional	101.95	0.6718	90.2159	9.04494	0.0673539
1295	G	C	371	functional	92.45	0.574346	85.2405	14.0902	0.0949388
1296	G	T	371	functional	133.2	0.642984	86.3462	12.9147	0.0961702
1298	C	G	372	functional	116.85	0.00933653	92.4048	7.58505	0.000766389
1302	A	C	373	non-functional	7.75	1.6647	67.3327	30.2546	0.747999
1303	A	G	373	partially functional	29.8	10.0224	30.1089	44.9171	14.9516
1304	A	T	373	partially functional	63.95	2.43947	40.1163	54.1513	3.29294
1305	C	A	374	non-functional	7.55	2.26304	50.2349	45.4544	2.04768
1306	C	G	374	non-functional	7.9	2.60764	52.3758	42.8816	2.13495
1307	C	T	374	non-functional	14.55	0.992015	49.008	49.008	0.992015
1320	T	A	376	non-functional	8.1	4.68668	77.0708	17.1968	1.04574
1321	T	C	376	non-functional	18.65	24.4488	44.5486	20.017	10.9856
1322	T	G	376	non-functional	7.85	4.98658	82.0026	12.265	0.745836
1324	A	C	377	non-functional	9.2	5.16061	84.8643	9.40324	0.571811
1325	A	G	377	non-functional	9.55	50.4103	41.2724	3.74415	4.57312
1326	A	T	377	functional	82.95	3.02357	30.1577	60.7301	6.08872
1333	T	A	379	non-functional	12.4	8.20218	27.2322	49.6203	14.9453
1334	T	C	379	non-functional	6.6	32.6778	29.5681	17.934	19.8201
1335	T	G	379	partially functional	57.75	7.17632	23.8262	53.0262	15.9712
1339	C	A	380	non-functional	9.75	19.8652	40.0036	26.8152	13.316
1340	C	G	380	non-functional	7.2	21.0681	31.4299	28.4389	19.0632
1341	C	T	380	non-functional	10.5	15.4491	41.9951	31.1107	11.445
1351	C	A	382	functional	81.35	1.21929	36.5348	60.2357	2.01026
1352	C	G	382	functional	86.5	1.14437	34.29	62.4805	2.08518
1353	C	T	382	functional	83.3	1.00414	36.7499	60.5904	1.65555
1354	C	A	383	functional	77.45	0.931174	41.6246	56.1873	1.25695
1355	C	G	383	functional	77.8	1.06737	39.0639	58.2764	1.59233
1356	C	T	383	partially functional	65.5	3.44026	34.3138	56.5739	5.67203
1363	G	A	385	functional	109.35	0.56533	11.355	83.9025	4.17726
1364	G	C	385	functional	78.8	2.15811	17.6235	71.4668	8.75157
1365	G	T	385	functional	98.3	0.185516	5.02984	91.413	3.3716
1367	C	A	386	functional	92	0.0321501	21.3844	78.4655	0.117968
1368	C	G	386	functional	82.05	0.410831	15.0357	82.3046	2.24887
1369	C	T	386	functional	96.65	0.236502	11.6838	86.3322	1.74753
1379	C	A	388	partially functional	36.4	4.57895	18.5686	61.6498	15.2027
1380	C	G	388	non-functional	18.25	8.84938	26.585	48.441	16.1246
1381	C	T	388	non-functional	18	10.9856	24.4488	44.5486	20.017
1382	T	A	389	non-functional	13.3	3.70785	67.3871	27.3975	1.5075
1383	T	C	389	non-functional	8.05	69.2161	18.8636	2.55291	9.36738
1384	T	G	389	non-functional	16.8	47.2013	25.9046	9.52977	17.3644
1390	A	C	391	partially functional	46.1	4.61974	62.199	30.8871	2.2941
1391	A	G	391	partially functional	38.1	2.94224	39.6135	53.4726	3.9716
1392	A	T	391	non-functional	8.85	12.9098	63.9427	19.2592	3.88836
1395	A	C	392	partially functional	26.3	7.75623	63.3387	25.7516	3.15345
1396	A	G	392	partially functional	32.3	3.95522	65.0422	29.2254	1.7772
1397	A	T	392	non-functional	9.3	14.6339	65.5845	16.1729	3.60867
1399	C	A	393	partially functional	35	0.362793	59.506	39.888	0.243187
1400	C	G	393	partially functional	35	0.362793	59.506	39.888	0.243187
1407	A	C	394	non-functional	7.05	2.16422	35.5898	58.6777	3.5682
1408	A	G	394	non-functional	0	6.19888	33.9324	50.6211	9.24764
1412	A	C	395	non-functional	7.05	13.3309	48.915	29.6685	8.0856
1413	A	G	395	non-functional	10.1	1.65696	27.2481	67.0195	4.07546
1414	A	T	395	non-functional	8.35	2.52876	62.0369	34.0466	1.38781
1417	G	C	396	non-functional	7.25	6.57338	35.9824	48.5711	8.87314
1418	G	T	396	non-functional	7.25	6.57338	35.9824	48.5711	8.87314
1425	A	C	397	functional	89.9	0.0577073	4.25302	94.4083	1.28098
1426	A	G	397	functional	98.05	1.80256	17.9791	72.9087	7.30974
1427	A	T	397	functional	89.9	0.0577073	4.25302	94.4083	1.28098
1428	T	A	398	non-functional	10.45	19.2978	42.9481	26.0493	11.7047
1429	T	C	398	non-functional	18.8	13.7315	41.2519	33.7742	11.2424
1431	T	G	398	non-functional	7.65	17.9922	44.2537	26.8412	10.9128
1433	G	A	399	functional	97	0.568979	10.3407	84.4439	4.64638
1434	G	C	399	functional	97	0.568979	10.3407	84.4439	4.64638
1435	G	T	399	functional	97	0.568979	10.3407	84.4439	4.64638
1439	T	A	400	non-functional	8.3	21.2141	38.6546	25.911	14.2202
1440	T	C	400	non-functional	6.6	14.1189	38.3791	34.7268	12.7753
1441	T	G	400	non-functional	7.55	28.5313	42.5637	17.3051	11.6
1443	T	A	401	partially functional	61.35	0.319381	35.115	63.9837	0.581949
1444	T	C	401	non-functional	7.9	45.4439	45.4439	4.55615	4.55615
1445	T	G	401	non-functional	7.8	46.7706	42.3198	5.18233	5.72736
1447	T	A	402	non-functional	6.6	14.1189	38.3791	34.7268	12.7753
1449	T	G	402	non-functional	6.6	14.1189	38.3791	34.7268	12.7753
1457	T	A	403	non-functional	17.95	67.4363	18.3785	3.03795	11.1472
1458	T	C	403	non-functional	7.95	84.7278	7.68634	0.630933	6.95489
1459	T	G	403	non-functional	15.25	59.2101	26.6048	4.39774	9.78736
1461	G	A	404	non-functional	6.55	81.8216	9.06609	0.908956	8.20334
1462	G	C	404	non-functional	17.95	67.4363	18.3785	3.03795	11.1472
1463	G	T	404	non-functional	7.25	74.6496	12.3395	1.8456	11.1652
1467	C	G	405	partially functional	38.45	78.1394	14.2748	1.17175	6.41407
1475	C	A	406	functional	95.5	4.6427	37.9131	51.1773	6.26699
1476	C	G	406	non-functional	11.3	2.58054	42.4361	51.8315	3.15188
1479	A	C	407	non-functional	13.35	47.7947	35.4072	7.14858	9.64958
1480	A	G	407	functional	103.4	3.11238	41.9042	51.1819	3.80147
1481	A	T	407	partially functional	31.55	40.84	30.255	12.3008	16.6043
1483	A	C	408	non-functional	19.05	13.2969	44.1473	32.7051	9.8506
1485	A	T	408	non-functional	19.05	13.2969	44.1473	32.7051	9.8506
1490	C	A	409	partially functional	36.7	2.04014	24.854	67.5602	5.54568
1491	C	G	409	functional	78.15	1.84803	33.5863	61.1983	3.36733
1493	T	A	410	functional	87.1	28.5313	42.5637	17.3051	11.6
1494	T	C	410	functional	87.25	5.0491	83.0306	11.237	0.683321
1495	T	G	410	functional	115.7	29.3383	43.7676	16.1012	10.793
1508	G	A	412	partially functional	47.35	11.7576	23.6768	43.142	21.4237
1509	G	C	412	non-functional	8.05	3.5682	58.6777	35.5898	2.16422
1510	G	T	412	functional	97.55	10.2423	25.192	45.9029	18.6627
1512	C	A	413	partially functional	47.8	19.1572	23.3986	31.5848	25.8594
1513	C	G	413	non-functional	17.35	13.3779	24.3762	40.1895	22.0565
1514	C	T	413	partially functional	67.95	1.96901	35.7851	58.9996	3.24635
1525	A	C	415	partially functional	44.65	10.9128	26.8412	44.2537	17.9922
1526	A	G	415	functional	100.4	15.1512	24.9801	37.2659	22.6029
1528	A	C	416	partially functional	64.35	32.6778	29.5681	17.934	19.8201
1529	A	G	416	functional	86.55	3.44557	25.4595	62.6202	8.47473
1530	A	T	416	partially functional	31.45	37.0892	27.4764	15.0794	20.355
1534	G	C	417	non-functional	18.5	16.0665	26.4892	35.7567	21.6875
1535	G	T	417	non-functional	18.5	16.0665	26.4892	35.7567	21.6875
1542	A	C	418	functional	75.15	26.0493	42.9481	19.2978	11.7047
1543	A	G	418	non-functional	14.45	2.09299	38.0382	56.7464	3.12237
1544	A	T	418	partially functional	24.55	7.14858	35.4072	47.7947	9.64958
1545	C	A	419	partially functional	54	8.41821	34.1375	46.0809	11.3634
1546	C	G	419	partially functional	24.55	7.14858	35.4072	47.7947	9.64958
1547	C	T	419	partially functional	37.5	9.28939	30.8418	46.0106	13.8581
1557	T	A	421	partially functional	28.8	1.399	84.4159	13.9539	0.231253
1558	T	C	421	non-functional	7.2	9.21836	83.1958	6.82913	0.756689
1559	T	G	421	non-functional	9.75	7.81971	77.9952	12.8925	1.29259
1562	G	A	422	non-functional	8.05	14.039	76.8487	7.70476	1.40753
1563	G	C	422	partially functional	28.8	1.399	84.4159	13.9539	0.231253
1564	G	T	422	partially functional	46.9	15.869	71.1201	10.6373	2.37351
1567	C	G	423	non-functional	13.25	19.7919	72.6223	5.9612	1.62462
1572	C	A	424	partially functional	43.2	48.8484	24.2574	8.92381	17.9703
1573	C	G	424	functional	80.5	42.9481	26.0493	11.7047	19.2978
1574	C	T	424	partially functional	45.55	44.2537	26.8412	10.9128	17.9922
1576	C	A	425	functional	109.95	5.18718	69.8388	23.2473	1.72666
1577	C	G	425	partially functional	62.15	51.766	23.26	7.74257	17.2314
1578	C	T	425	partially functional	38.75	61.6498	18.5686	4.57895	15.2027
1586	G	A	427	non-functional	7.5	3.22888	32.2055	58.6822	5.88341
1587	G	C	427	partially functional	67.6	2.19268	26.7124	65.7018	5.39313
1588	G	T	427	partially functional	67.6	2.19268	26.7124	65.7018	5.39313
1589	T	A	428	non-functional	7.3	4.07546	67.0195	27.2481	1.65696
1590	T	C	428	non-functional	11.05	17.8092	39.6351	29.3624	13.1934
1591	T	G	428	non-functional	13.2	35.5475	35.5475	14.4525	14.4525
1603	C	A	430	partially functional	60.2	2.94224	39.6135	53.4726	3.9716
1604	C	G	430	functional	89.95	0.332742	44.6839	54.577	0.406412
1607	A	C	431	non-functional	14.05	17.8189	65.3829	13.2006	3.59758
1608	A	G	431	partially functional	52.15	4.49043	40.5262	49.4988	5.48462
1609	A	T	431	partially functional	54.6	7.09176	64.0032	26.0218	2.88329
1611	G	C	432	partially functional	45.45	3.29294	54.1513	40.1163	2.43947
1612	G	T	432	partially functional	45.45	3.29294	54.1513	40.1163	2.43947
1615	C	A	433	functional	100.95	0.119873	19.6617	79.7323	0.486108
1616	C	G	433	functional	113.7	0.171096	22.9764	76.2844	0.568058
1618	T	A	434	non-functional	10.6	3.83033	62.9884	31.2791	1.90209
1619	T	C	434	non-functional	9.95	11.1652	74.6496	12.3395	1.8456
1620	T	G	434	non-functional	8.6	16.4567	54.6382	22.2142	6.6908
1625	T	A	436	functional	85.05	0.356526	96.4139	3.21765	0.0118984
1626	T	C	436	functional	85.05	0.356526	96.4139	3.21765	0.0118984
1627	T	G	436	non-functional	7.15	4.19607	93.1442	2.54505	0.114652
1629	G	C	437	partially functional	47.8	3.48654	94.5294	1.91346	0.0705743
1630	G	T	437	functional	79.55	0.378873	92.7073	6.8857	0.0281403
1635	G	C	438	partially functional	62.45	5.60699	92.2049	2.06269	0.125433
1636	G	T	438	partially functional	62.45	5.60699	92.2049	2.06269	0.125433
1639	G	A	439	partially functional	60.25	1.29259	12.8925	77.9952	7.81971
1640	G	C	439	partially functional	20.6	1.37085	27.5342	67.7232	3.37174
1641	G	T	439	functional	95.2	5.18233	42.3198	46.7706	5.72736
1642	T	A	440	non-functional	8.55	32.9098	40.1961	14.7873	12.1068
1643	T	C	440	partially functional	33.05	17.8092	39.6351	29.3624	13.1934
1644	T	G	440	non-functional	9.2	30.255	40.84	16.6043	12.3008
1658	G	A	442	functional	91.2	0.611481	13.5736	82.1156	3.69924
1659	G	C	442	functional	78.35	1.47032	29.5322	65.7252	3.27226
1660	G	T	442	partially functional	71.65	3.12237	56.7464	38.0382	2.09299
1665	A	C	443	functional	80.1	0.844319	41.7114	56.3045	1.13971
1666	A	G	443	partially functional	54.35	1.83446	40.7213	54.968	2.47626
1667	A	T	443	partially functional	42	1.23498	61.011	37.005	0.749052
1669	T	A	444	functional	90.75	0.420191	12.5907	84.1798	2.80936
1671	T	G	444	functional	90.75	0.420191	12.5907	84.1798	2.80936
1680	T	A	445	functional	103	0.167147	24.8068	74.5239	0.502138
1681	T	C	445	partially functional	60.1	6.73822	40.7639	45.051	7.44689
1682	T	G	445	functional	86.75	1.13396	18.6476	75.6199	4.59845
1684	C	A	446	functional	77.05	3.60342	43.8987	48.5155	3.9824
1685	C	G	446	partially functional	71.9	4.10205	40.9146	49.9731	5.01025
1686	C	T	446	partially functional	72.15	1.39239	46.1097	50.9591	1.53883
1698	A	C	448	functional	89.6	0.0392551	21.3772	78.4395	0.144039
1699	A	G	448	functional	82.4	0.495492	24.4785	73.5375	1.48854
1700	A	T	448	functional	77.8	0.588478	26.3057	71.5062	1.59965
1701	C	A	449	functional	88.25	1.00124	30.0013	66.7691	2.2283
1702	C	G	449	functional	92.35	1.68051	33.7539	61.5035	3.06208
1703	C	T	449	functional	85.95	2.44988	32.9845	60.1017	4.46397
1716	C	A	451	non-functional	15.55	2.60046	70.5054	25.9375	0.956657
1717	C	G	451	non-functional	6.55	2.70233	66.2951	29.7883	1.21424
1718	C	T	451	non-functional	5.2	2.78449	68.3105	27.773	1.13209
1721	C	A	452	non-functional	7.75	3.23417	71.7918	23.8974	1.07656
1722	C	G	452	non-functional	6.65	2.66876	72.3572	24.0856	0.888355
1723	C	T	452	partially functional	39.35	3.80443	76.414	18.8435	0.93816
1734	C	A	454	non-functional	15.6	15.6567	57.4491	21.1344	5.75978
1735	C	G	454	non-functional	17.95	14.7768	54.2206	24.3629	6.63966
1736	C	T	454	non-functional	14.95	16.4567	54.6382	22.2142	6.6908
1739	C	A	455	non-functional	15.7	13.3364	59.7695	21.988	4.90618
1740	C	G	455	non-functional	14.4	14.8414	60.1847	20.0337	4.94026
1741	C	T	455	non-functional	16.05	10.4371	69.7813	17.2079	2.57376
1753	C	A	457	partially functional	61.9	0.602548	24.3714	73.2159	1.81015
1754	C	G	457	functional	82.15	0.53473	17.7078	79.361	2.39649
1755	C	T	457	partially functional	66.25	0.664233	24.3098	73.0305	1.99547
1756	C	A	458	partially functional	61.85	0.533588	26.3606	71.6554	1.45044
1757	C	G	458	partially functional	71.9	0.292254	19.4894	79.0332	1.18515
1758	C	T	458	partially functional	65.45	1.62747	36.1266	59.5627	2.68325
1768	G	A	460	partially functional	22.8	2.78449	68.3105	27.773	1.13209
1769	G	C	460	partially functional	25.8	17.18	63.0384	15.5451	4.23653
1770	G	T	460	partially functional	22.2	20.4181	61.3394	13.6867	4.55589
1772	G	A	461	partially functional	66.5	7.28972	59.5291	29.5613	3.61997
1773	G	C	461	partially functional	26.2	8.97715	60.0203	26.9689	4.03369
1774	G	T	461	non-functional	11.45	27.6074	55.5945	11.2243	5.57384
1788	A	C	463	non-functional	8.7	8.87314	48.5711	35.9824	6.57338
1789	A	G	463	functional	75.2	0.219525	26.6746	72.5091	0.596732
1790	A	T	463	functional	84.4	0.174814	21.2417	77.9421	0.641443
1792	C	A	464	non-functional	9	1.37085	27.5342	67.7232	3.37174
1793	C	G	464	functional	84.4	0.174814	21.2417	77.9421	0.641443
1794	C	T	464	non-functional	15.55	2.61026	35.1438	57.9423	4.30359
1809	C	A	466	partially functional	41.1	1.9444	71.1615	26.1788	0.715303
1810	C	G	466	non-functional	13.1	3.46711	69.6387	25.6187	1.27548
1811	C	T	466	partially functional	62.7	1.26783	84.5471	13.9755	0.209571
1814	G	A	467	partially functional	52.65	2.24985	55.1944	40.889	1.66673
1815	G	C	467	non-functional	7.2	0.140257	84.4132	15.4209	0.0256227
1816	G	T	467	functional	77.85	0.0375281	74.9885	24.9615	0.012492
1835	G	A	469	partially functional	74.65	0.209571	13.9755	84.5471	1.26783
1836	G	C	469	non-functional	18.1	0.38695	28.5181	70.1432	0.951742
1837	G	T	469	non-functional	10.95	3.95088	43.5512	48.1315	4.36639
1839	T	A	470	non-functional	7.65	27.6004	45.5054	16.7405	10.1536
1840	T	C	470	non-functional	12.35	11.3634	46.0809	34.1375	8.41821
1841	T	G	470	non-functional	7.65	25.192	45.9029	18.6627	10.2423
1856	C	A	472	non-functional	12.95	25.9046	47.2013	17.3644	9.52977
1857	C	G	472	non-functional	11.9	27.6004	45.5054	16.7405	10.1536
1858	C	T	472	partially functional	27.9	55.4069	30.408	5.0264	9.1587
1861	G	A	473	non-functional	19.35	2.04336	55.4009	41.042	1.51376
1862	G	C	473	non-functional	7.2	19.572	64.9814	11.871	3.57549
1863	G	T	473	non-functional	14.4	24.8945	50.1315	16.6873	8.28668
1875	G	A	475	functional	116.65	0.352636	35.0817	63.9231	0.642544
1876	G	C	475	non-functional	7.65	11.3552	50.8907	30.8668	6.88731
1877	G	T	475	partially functional	67.85	2.94717	32.4872	59.1955	5.3701
1879	C	A	476	non-functional	7.45	4.24496	38.3108	51.7142	5.73009
1880	C	G	476	partially functional	20.2	3.14011	34.614	57.0688	5.17716
1881	C	T	476	non-functional	16.25	3.44026	34.3138	56.5739	5.67203
1888	A	C	478	functional	78.65	3.14011	34.614	57.0688	5.17716
1889	A	G	478	functional	93.05	2.99592	54.4483	40.3363	2.21943
1890	A	T	478	functional	78.65	3.14011	34.614	57.0688	5.17716
1891	T	A	479	partially functional	25.15	5.75244	77.4494	15.6368	1.1614
1892	T	C	479	functional	91.5	0.332764	81.4247	18.1683	0.0742497
1893	T	G	479	partially functional	33.4	6.41407	78.1394	14.2748	1.17175
1894	G	A	480	partially functional	53.6	2.43947	40.1163	54.1513	3.29294
1895	G	C	480	partially functional	53.6	2.43947	40.1163	54.1513	3.29294
1896	G	T	480	partially functional	53.6	2.43947	40.1163	54.1513	3.29294
1904	G	A	481	partially functional	21.6	2.68799	32.7464	59.6678	4.89783
1905	G	C	481	partially functional	23.25	0.139297	62.1066	37.6696	0.0844879
1906	G	T	481	partially functional	20.55	2.44988	32.9845	60.1017	4.46397
1911	C	A	482	non-functional	0	2.43947	40.1163	54.1513	3.29294
1912	C	G	482	partially functional	25.45	2.16422	35.5898	58.6777	3.5682
1913	C	T	482	partially functional	38.1	4.11885	33.6352	55.4551	6.79083
1922	A	C	484	partially functional	67.05	1.00124	30.0013	66.7691	2.2283
1923	A	G	484	partially functional	71.05	0.267645	26.6265	72.3783	0.727535
1924	A	T	484	non-functional	16	11.2432	41.2547	37.3288	10.1733
1927	T	A	485	non-functional	0	30.8668	50.8907	11.3552	6.88731
1928	T	C	485	non-functional	19.95	16.9222	56.1837	20.6688	6.22533
1929	T	G	485	non-functional	17	26.2137	58.3397	10.6577	4.78882
1931	C	G	486	partially functional	66	5.22141	34.9098	52.0793	7.78943
1938	T	A	487	non-functional	7.45	64.2479	17.5096	3.90692	14.3356
1939	T	C	487	non-functional	10.2	44.5486	24.4488	10.9856	20.017
1940	T	G	487	non-functional	7	71.1201	15.869	2.37351	10.6373
1942	A	C	488	non-functional	5.95	42.7637	47.2612	5.23669	4.73836
1943	A	G	488	non-functional	5.6	77.5209	14.1618	1.28473	7.03254
1944	A	T	488	functional	92.2	9.59105	23.5902	47.5048	19.314
1954	A	C	490	partially functional	33.1	5.83169	31.9224	52.6311	9.61483
1955	A	G	490	non-functional	10.65	8.59471	31.5365	47.047	12.8218
1958	A	C	491	partially functional	39.9	19.2978	42.9481	26.0493	11.7047
1959	A	G	491	partially functional	53.75	0.933502	27.9715	68.7989	2.29604
1960	A	T	491	partially functional	23.35	17.3644	47.2013	25.9046	9.52977
1963	G	C	492	partially functional	23.3	9.11395	33.4418	45.1417	12.3025
1964	G	T	492	partially functional	23.3	9.11395	33.4418	45.1417	12.3025
1970	C	A	493	partially functional	70.35	0.00241657	2.92881	96.9888	0.0800259
1971	C	G	493	functional	77.7	0.904252	11.016	81.3981	6.68157
1973	A	C	494	partially functional	50.85	12.487	37.513	37.513	12.487
1974	A	G	494	partially functional	67.45	0.150505	7.43531	90.5807	1.83353
1975	A	T	494	partially functional	55.2	0.0626265	37.6914	62.1427	0.103254
1978	G	C	495	functional	89.85	1.5307	15.2675	75.6202	7.5816
1979	G	T	495	functional	89.85	1.5307	15.2675	75.6202	7.5816
1983	T	A	496	functional	90.7	1.18441	23.7896	71.4678	3.55817
1984	T	C	496	functional	87.6	2.37129	47.6287	47.6287	2.37129
1985	T	G	496	functional	83.4	0.208636	22.9389	76.1598	0.692694
1989	C	T	497	partially functional	62.5	0.93816	18.8435	76.414	3.80443
2001	C	A	499	partially functional	63.3	1.72666	23.2473	69.8388	5.18718
2002	C	G	499	functional	78.1	0.0921597	16.706	82.7454	0.45647
2005	A	C	500	partially functional	61.5	15.2261	55.8689	22.7146	6.19045
2006	A	G	500	partially functional	60.25	2.19268	26.7124	65.7018	5.39313
2007	A	T	500	partially functional	25.75	12.3132	49.9327	30.2857	7.46836
2009	G	C	501	partially functional	68.45	3.14011	34.614	57.0688	5.17716
2010	G	T	501	partially functional	68.45	3.14011	34.614	57.0688	5.17716
2017	C	A	502	partially functional	37.2	24.9376	27.5603	24.9376	22.5645
2018	C	G	502	partially functional	31.5	23.0531	34.3912	25.4776	17.0781
2019	C	T	502	functional	93.4	0.796667	16.0015	79.2559	3.94592
2021	A	C	503	non-functional	14.3	68.8393	16.9756	2.80604	11.3791
2022	A	G	503	non-functional	16.95	31.5848	23.3986	19.1572	25.8594
2023	A	T	503	non-functional	16.05	24.9801	37.2659	22.6029	15.1512
2025	C	A	504	partially functional	25.5	12.152	40.346	36.5065	10.9956
2026	C	G	504	partially functional	25.5	12.152	40.346	36.5065	10.9956
2031	A	C	505	partially functional	48.9	1.96901	35.7851	58.9996	3.24635
2032	A	G	505	partially functional	68.55	0.517762	56.9265	42.1722	0.383568
2033	A	T	505	partially functional	48.9	1.96901	35.7851	58.9996	3.24635
2035	T	A	506	partially functional	62.55	19.2592	63.9427	12.9098	3.88836
2036	T	C	506	functional	76.4	9.74573	72.0117	16.068	2.17457
2037	T	G	506	functional	88.25	15.4247	69.1288	12.6287	2.81784
2039	G	A	507	partially functional	46.35	0.62872	41.927	56.5956	0.848683
2040	G	C	507	partially functional	46.35	0.62872	41.927	56.5956	0.848683
2041	G	T	507	partially functional	46.35	0.62872	41.927	56.5956	0.848683
2044	A	C	508	partially functional	39.6	11.5903	57.4071	25.7947	5.20786
2045	A	G	508	partially functional	47.05	0.296632	39.8346	59.4262	0.442522
2046	A	T	508	partially functional	59.05	2.21943	40.3363	54.4483	2.99592
2048	C	A	509	partially functional	43.15	5.72736	46.7706	42.3198	5.18233
2049	C	G	509	partially functional	48.9	5.99851	48.9849	40.1054	4.91117
2050	C	T	509	partially functional	68.4	0.815125	49.1849	49.1849	0.815125
2064	G	A	511	functional	80.35	11.5738	38.4262	38.4262	11.5738
2065	G	C	511	partially functional	40.75	7.97948	39.5226	43.6792	8.81869
2067	A	C	512	partially functional	72.5	24.4488	44.5486	20.017	10.9856
2068	A	G	512	non-functional	0	24.3762	40.1895	22.0565	13.3779
2069	A	T	512	partially functional	29.5	48.915	29.6685	8.0856	13.3309
2071	G	C	513	partially functional	64.45	1.13209	27.773	68.3105	2.78449
2072	G	T	513	partially functional	64.45	1.13209	27.773	68.3105	2.78449
2078	G	A	514	functional	91.5	1.17981	13.0053	78.6774	7.13746
2079	G	C	514	partially functional	51.55	5.27302	23.632	58.1254	12.9695
2080	G	T	514	non-functional	18.6	17.934	29.5681	32.6778	19.8201
2083	T	A	515	non-functional	8.95	16.9222	56.1837	20.6688	6.22533
2084	T	C	515	functional	89.85	5.73009	51.7142	38.3108	4.24496
2085	T	G	515	non-functional	15.6	32.0045	39.0904	15.893	13.0121
2094	G	A	517	non-functional	7.7	4.61031	30.8241	56.1651	8.40054
2095	G	C	517	non-functional	0	3.76079	25.1443	61.8449	9.25006
2096	G	T	517	non-functional	0	3.76079	25.1443	61.8449	9.25006
2100	T	A	518	non-functional	7.4	47.5048	23.5902	9.59105	19.314
2101	T	C	518	partially functional	22	28.7221	28.7221	21.2779	21.2779
2102	T	G	518	non-functional	0	47.5048	23.5902	9.59105	19.314
2116	A	G	520	partially functional	25.1	16.9222	56.1837	20.6688	6.22533
2117	A	T	520	non-functional	19.5	17.18	63.0384	15.5451	4.23653
2121	G	A	521	functional	101.95	0.474357	34.96	63.7013	0.864335
2122	G	C	521	partially functional	65.75	15.2261	55.8689	22.7146	6.19045
2123	G	T	521	partially functional	39.4	4.07546	67.0195	27.2481	1.65696
2128	G	C	522	partially functional	50.6	13.3364	59.7695	21.988	4.90618
2129	G	T	522	partially functional	50.6	13.3364	59.7695	21.988	4.90618
2138	C	A	523	partially functional	51.6	25.9046	47.2013	17.3644	9.52977
2139	C	G	523	non-functional	8.6	27.6004	45.5054	16.7405	10.1536
2140	C	T	523	partially functional	72.5	55.4069	30.408	5.0264	9.1587
2143	G	A	524	non-functional	9.15	1.52784	55.9164	41.4239	1.13185
2144	G	C	524	non-functional	19.55	44.3888	40.1647	7.33742	8.1091
2145	G	T	524	partially functional	38.9	33.7742	41.2519	13.7315	11.2424
2160	T	A	526	non-functional	6.65	59.2101	26.6048	4.39774	9.78736
2161	T	C	526	non-functional	7.55	82.3321	10.0821	0.827589	6.75823
2162	T	G	526	non-functional	12.85	61.0101	24.8048	4.10021	10.0849
2166	G	A	527	non-functional	13.2	77.9952	12.8925	1.29259	7.81971
2167	G	C	527	non-functional	6.65	59.2101	26.6048	4.39774	9.78736
2168	G	T	527	partially functional	23.65	71.1201	15.869	2.37351	10.6373
2173	C	G	528	non-functional	8.8	78.1394	14.2748	1.17175	6.41407
2182	C	A	529	partially functional	21.4	34.7268	38.3791	14.1189	12.7753
2183	C	G	529	partially functional	37.8	29.3624	39.6351	17.8092	13.1934
2184	C	T	529	partially functional	26.9	33.7716	37.3234	15.1745	13.7305
2188	C	A	530	partially functional	46.55	35.6389	39.3871	13.1108	11.8632
2189	C	G	530	non-functional	11.95	14.8414	60.1847	20.0337	4.94026
2190	C	T	530	non-functional	13.45	51.7935	28.4249	7.00949	12.7721
2201	C	A	532	partially functional	26.1	0.148063	72.9578	26.8397	0.0544693
2202	C	G	532	non-functional	7.55	1.89091	69.204	28.1363	0.768787
2203	C	T	532	partially functional	43.75	6.66521	60.1536	29.8714	3.30984
2206	A	C	533	non-functional	7.05	14.3786	78.7076	5.84589	1.06795
2207	A	G	533	partially functional	27.3	3.91287	71.1131	23.6715	1.30248
2208	A	T	533	partially functional	46.25	11.1652	74.6496	12.3395	1.8456
2210	C	A	534	non-functional	16.45	3.55817	71.4678	23.7896	1.18441
2211	C	G	534	non-functional	16.45	3.55817	71.4678	23.7896	1.18441
2218	C	A	535	partially functional	23.75	15.6567	57.4491	21.1344	5.75978
2219	C	G	535	partially functional	22.3	17.7552	53.3397	21.6863	7.21874
2220	C	T	535	partially functional	21.95	8.69369	58.1251	28.8641	4.31716
2223	A	C	536	partially functional	27.95	46.5431	46.5431	3.45692	3.45692
2224	A	G	536	non-functional	19.25	13.6867	61.3394	20.4181	4.55589
2225	A	T	536	partially functional	21.95	4.91927	80.8956	13.372	0.81315
2226	T	A	537	non-functional	16.8	14.8414	60.1847	20.0337	4.94026
2228	T	G	537	non-functional	16.8	14.8414	60.1847	20.0337	4.94026
2229	G	A	538	partially functional	22.75	2.15536	47.8446	47.8446	2.15536
2230	G	C	538	partially functional	56.5	0.260611	47.2415	52.2099	0.288019
2234	A	C	539	partially functional	47.2	6.28725	62.7102	28.1775	2.82504
2235	A	G	539	partially functional	49.4	8.40054	56.1651	30.8241	4.61031
2236	A	T	539	partially functional	69	11.1472	67.4363	18.3785	3.03795
2238	G	C	540	partially functional	51.15	6.19045	22.7146	55.8689	15.2261
2239	G	T	540	partially functional	51.15	6.19045	22.7146	55.8689	15.2261
2240	C	A	541	partially functional	37.65	3.81273	69.2931	25.4915	1.40263
2241	C	G	541	partially functional	34.4	5.54568	67.5602	24.854	2.04014
2242	C	T	541	partially functional	32.4	1.1488	84.6661	13.9952	0.189895
2245	G	A	542	partially functional	42.15	3.29294	54.1513	40.1163	2.43947
2246	G	C	542	non-functional	14.2	8.43425	76.1192	13.9057	1.5408
2247	G	T	542	partially functional	67.15	0.185511	74.8405	24.9122	0.0617513
2253	T	A	544	functional	75.55	0.389315	35.0451	63.8563	0.709379
2254	T	C	544	partially functional	73.25	2.36099	70.7449	26.0256	0.868559
2255	T	G	544	partially functional	44.75	0.571674	56.8726	42.1322	0.423506
2256	G	A	545	partially functional	51.5	5.18718	69.8388	23.2473	1.72666
2257	G	C	545	functional	75.55	0.389315	35.0451	63.8563	0.709379
2258	G	T	545	functional	103.45	3.95522	65.0422	29.2254	1.7772
2260	C	G	546	functional	76.35	4.59845	75.6199	18.6476	1.13396
2263	T	A	547	functional	88.2	0.997826	22.1497	73.5396	3.3129
2264	T	C	547	functional	102.25	1.20311	53.7803	44.0316	0.98502
2265	T	G	547	functional	79.25	1.18441	23.7896	71.4678	3.55817
2268	C	T	548	functional	94.3	0.775606	51.7223	46.8003	0.701797
2273	G	A	550	partially functional	61.45	2.2941	30.8871	62.199	4.61974
2274	G	C	550	partially functional	71.05	5.01025	49.9731	40.9146	4.10205
2275	G	T	550	functional	93.1	7.44998	74.3075	16.5802	1.66232
2278	A	C	551	functional	93.5	3.70785	67.3871	27.3975	1.5075
2279	A	G	551	functional	86.2	4.30359	57.9423	35.1438	2.61026
2280	A	T	551	functional	93.4	8.43425	76.1192	13.9057	1.5408
2283	T	A	552	partially functional	73.75	0.506497	22.641	75.1708	1.68163
2285	T	G	552	partially functional	73.75	0.506497	22.641	75.1708	1.68163
2288	A	C	553	functional	94.05	1.68051	33.7539	61.5035	3.06208
2289	A	G	553	partially functional	58.75	0.244988	7.34083	89.4296	2.98456
2290	A	T	553	partially functional	68.6	1.26044	34.1739	62.269	2.29668
2291	G	A	554	functional	98.6	0.774761	19.0069	77.0766	3.14181
2292	G	C	554	functional	87.2	0.691656	20.7248	76.0456	2.53789
2293	G	T	554	functional	81.95	1.17634	38.9549	58.1139	1.75489
2295	C	A	555	functional	94.05	1.68051	33.7539	61.5035	3.06208
2296	C	G	555	functional	94.05	1.68051	33.7539	61.5035	3.06208
2302	G	A	556	functional	92.15	0.893143	44.1235	53.8925	1.09089
2303	G	C	556	partially functional	73	5.88341	58.6822	32.2055	3.22888
2304	G	T	556	partially functional	74.8	6.536	72.0475	19.6352	1.78127
2305	A	C	557	functional	82.95	5.05442	68.0514	25.0347	1.85942
2306	A	G	557	functional	89.35	2.95207	59.2939	35.9635	1.79052
2307	A	T	557	functional	85.45	6.67198	73.5464	18.1363	1.64529
2308	T	A	558	functional	81.75	2.77461	37.3566	55.7295	4.13923
2310	T	G	558	functional	81.75	2.77461	37.3566	55.7295	4.13923
2316	G	A	559	functional	78.7	1.20723	21.9403	72.8443	4.00813
2317	G	C	559	functional	77.7	1.5075	27.3975	67.3871	3.70785
2318	G	T	559	partially functional	70.95	2.77461	37.3566	55.7295	4.13923
2321	G	A	560	partially functional	58.95	0.217339	19.5643	79.337	0.881355
2322	G	C	560	partially functional	63.3	1.43161	23.5424	70.7252	4.3008
2323	G	T	560	partially functional	72.7	2.14347	28.8591	64.2271	4.77037
2331	C	A	562	partially functional	73.3	NA	NA	NA	NA
2332	C	G	562	functional	95.3	NA	NA	NA	NA
2334	T	A	563	partially functional	61	NA	NA	NA	NA
2335	T	C	563	partially functional	65.05	NA	NA	NA	NA
2336	T	G	563	partially functional	67.6	NA	NA	NA	NA
2344	G	A	565	partially functional	35.75	2.63391	26.2711	64.6166	6.47838
2345	G	C	565	partially functional	41.1	4.32853	43.1736	47.7142	4.78377
2346	G	T	565	partially functional	44.6	1.40263	25.4915	69.2931	3.81273
2349	C	A	566	partially functional	26.45	0.150122	44.8665	54.8	0.183359
2350	C	G	566	partially functional	47.65	2.61026	35.1438	57.9423	4.30359
2351	C	T	566	functional	83.5	2.2941	30.8871	62.199	4.61974
2358	C	A	568	partially functional	39.45	2.08518	62.4805	34.29	1.14437
2359	C	G	568	partially functional	26.25	0.884503	58.9843	39.5383	0.5929
2360	C	T	568	partially functional	32	2.21416	60.0318	36.4111	1.34296
2361	C	A	569	partially functional	50.85	3.37174	67.7232	27.5342	1.37085
2362	C	G	569	partially functional	34.7	3.55817	71.4678	23.7896	1.18441
2363	C	T	569	partially functional	25.3	1.18515	79.0332	19.4894	0.292254
2377	C	A	571	functional	80.95	1.46208	65.3567	32.4552	0.726047
2378	C	G	571	functional	104.3	0.377198	61.8687	37.5253	0.228782
2379	C	T	571	functional	90.6	0.581949	63.9837	35.115	0.319381
2382	C	A	572	partially functional	62.95	3.15139	69.9545	25.7348	1.15933
2383	C	G	572	functional	101.7	2.25272	74.5998	22.469	0.678505
2384	C	T	572	partially functional	66.05	6.92012	76.2817	15.401	1.39715
2392	C	A	574	functional	89.45	1.96901	35.7851	58.9996	3.24635
2393	C	G	574	functional	107.5	3.45692	46.5431	46.5431	3.45692
2395	A	C	575	functional	77.55	7.66607	69.1864	20.8385	2.30898
2396	A	G	575	functional	88.7	1.86045	45.6416	50.4418	2.05612
2397	A	T	575	functional	77.6	8.94332	66.0827	21.997	2.97697
2401	G	C	576	functional	118.3	3.9824	48.5155	43.8987	3.60342
2402	G	T	576	functional	118.3	3.9824	48.5155	43.8987	3.60342
2406	C	A	577	non-functional	14.55	45.5054	27.6004	10.1536	16.7405
2407	C	G	577	non-functional	11.3	48.441	26.585	8.84938	16.1246
2408	C	T	577	non-functional	15.55	32.6778	29.5681	17.934	19.8201
2409	A	C	578	non-functional	11.75	69.1864	20.8385	2.30898	7.66607
2410	A	G	578	non-functional	8.65	45.5054	27.6004	10.1536	16.7405
2411	A	T	578	non-functional	9	65.2645	21.7247	3.24933	9.76152
2414	T	A	579	partially functional	35.55	41.3079	27.6895	12.4417	18.5608
2416	T	G	579	partially functional	35.55	41.3079	27.6895	12.4417	18.5608
2423	C	A	580	functional	124.3	4.23653	17.18	63.0384	15.5451
2424	C	G	580	functional	103.85	5.78086	19.1931	57.6593	17.3667
2425	C	T	580	non-functional	11.95	8.9613	22.0412	49.0537	19.9437
2429	T	A	581	non-functional	8.55	32.9179	26.9509	18.0657	22.0655
2430	T	C	581	non-functional	3.45	58.9581	19.6254	5.34855	16.0679
2431	T	G	581	non-functional	9.95	38.6546	25.911	14.2202	21.2141
2440	A	C	583	functional	82	2.88329	26.0218	64.0032	7.09176
2441	A	G	583	functional	78.55	1.51728	16.7253	74.9575	6.79999
2442	A	T	583	non-functional	10.1	13.9563	31.0603	37.9371	17.0463
2445	T	A	584	non-functional	10.05	53.0262	23.8262	7.17632	15.9712
2446	T	C	584	non-functional	11.35	24.4458	32.9984	24.4458	18.1099
2447	T	G	584	non-functional	9.5	45.9029	25.192	10.2423	18.6627
2451	C	G	585	partially functional	73.7	2.40411	26.5009	65.1818	5.91316
2457	C	G	586	partially functional	23	13.3364	59.7695	21.988	4.90618
2461	G	A	587	partially functional	55.65	0.654239	39.477	58.8928	0.976011
2462	G	C	587	non-functional	9.6	16.4591	60.3934	18.1901	4.95739
2463	G	T	587	partially functional	38.4	8.1851	66.8409	22.2494	2.72458
2469	G	A	589	partially functional	30.6	2.2941	30.8871	62.199	4.61974
2470	G	C	589	partially functional	25.75	2.2941	30.8871	62.199	4.61974
2471	G	T	589	partially functional	25.75	2.2941	30.8871	62.199	4.61974
2472	T	A	590	non-functional	10.65	24.8945	50.1315	16.6873	8.28668
2473	T	C	590	functional	81.75	8.66559	38.8365	42.921	9.57696
2474	T	G	590	non-functional	14.4	32.9098	40.1961	14.7873	12.1068
2481	G	A	592	functional	97.6	8.20218	27.2322	49.6203	14.9453
2482	G	C	592	functional	115.1	7.10626	26.075	52.5085	14.3102
2485	A	C	593	functional	98.3	18.6023	33.8956	30.67	16.8321
2486	A	G	593	partially functional	67.8	13.2969	44.1473	32.7051	9.8506
2487	A	T	593	functional	108.3	36.7392	30.0795	14.9371	18.2442
2488	A	C	594	partially functional	36.85	3.85761	21.1164	63.4371	11.5889
2490	A	T	594	partially functional	36.85	3.85761	21.1164	63.4371	11.5889
2496	G	A	595	functional	92.55	8.1851	66.8409	22.2494	2.72458
2497	G	C	595	functional	92.55	8.1851	66.8409	22.2494	2.72458
2499	G	A	596	non-functional	19.35	1.20182	65.617	32.5844	0.596804
2500	G	C	596	partially functional	74.9	5.23669	47.2612	42.7637	4.73836
2501	G	T	596	non-functional	1.95	17.3667	57.6593	19.1931	5.78086
2507	A	C	598	functional	85.55	10.0304	44.953	36.8044	8.21218
2508	A	G	598	non-functional	0	6.74131	33.3899	49.8119	10.0569
2509	A	T	598	non-functional	17.6	19.314	47.5048	23.5902	9.59105
2510	A	C	599	functional	86.95	1.77571	53.2077	43.5628	1.45383
2511	A	G	599	functional	80.95	5.72736	46.7706	42.3198	5.18233
2512	A	T	599	partially functional	44.1	22.7146	55.8689	15.2261	6.19045
2515	T	A	600	partially functional	33.35	7.09255	42.9074	42.9074	7.09255
2517	T	G	600	partially functional	33.35	7.09255	42.9074	42.9074	7.09255
2520	T	A	601	functional	94.1	0.492392	16.3058	80.763	2.43883
2522	T	G	601	functional	97.8	0.838793	20.5777	75.5057	3.07778
2525	T	C	602	functional	102.85	0.257879	42.2979	57.0962	0.348101
2526	T	G	602	functional	116.05	1.34296	36.4111	60.0318	2.21416
2528	G	C	603	functional	100.85	0.36003	26.5341	72.1272	0.978662
2529	G	T	603	functional	100.85	0.36003	26.5341	72.1272	0.978662
2533	C	A	604	functional	99	1.07656	23.8974	71.7918	3.23417
2534	C	G	604	functional	93.8	4.73836	42.7637	47.2612	5.23669
2535	C	T	604	functional	83.55	0.175009	47.3271	52.3045	0.193415
2536	G	A	605	functional	88.6	0.0833449	7.50247	91.3988	1.01535
2537	G	C	605	partially functional	68.55	5.66239	41.8397	46.24	6.25791
2538	G	T	605	non-functional	0	1.13185	41.4239	55.9164	1.52784
2549	G	A	607	partially functional	41.35	0.678562	12.3323	82.4524	4.53679
2550	G	C	607	partially functional	26.45	0.786386	17.4562	78.2331	3.52434
2551	G	T	607	partially functional	26.45	0.786386	17.4562	78.2331	3.52434
2554	T	A	608	partially functional	24.95	1.60038	21.5471	71.539	5.31346
2555	T	C	608	functional	109	0.0080459	2.40466	97.2619	0.325435
2556	T	G	608	partially functional	69.05	1.13396	18.6476	75.6199	4.59845
2566	G	A	610	functional	89.9	0.509579	12.5013	83.5822	3.40699
2567	G	C	610	functional	107.3	0.0683708	16.7298	82.8632	0.338643
2569	A	C	611	functional	84.15	0.703029	34.7313	63.2846	1.281
2570	A	G	611	partially functional	36.35	3.74415	41.2724	50.4103	4.57312
2571	A	T	611	functional	89.15	0.22379	54.7596	44.8334	0.183224
2573	G	C	612	functional	80.5	1.06795	14.3786	78.7076	5.84589
2574	G	T	612	functional	80.5	1.06795	14.3786	78.7076	5.84589
2579	T	A	613	non-functional	9.35	6.31154	76.8903	15.5239	1.27428
2580	T	C	613	non-functional	14.8	4.89783	59.6678	32.7464	2.68799
2581	T	G	613	non-functional	9.3	8.02608	80.0536	10.8341	1.08621
2584	A	C	614	non-functional	9.15	71.4929	13.0606	2.38595	13.0606
2585	A	G	614	non-functional	8.25	4.91927	80.8956	13.372	0.81315
2586	A	T	614	non-functional	13.8	1.52748	33.9069	61.7824	2.78325
2592	T	A	616	functional	111.1	0.189895	13.9952	84.6661	1.1488
2594	T	G	616	functional	105.55	0.142949	12.8679	86.0334	0.955745
2597	T	C	617	supertrans	160.25	0.747999	30.2546	67.3327	1.6647
2598	T	G	617	supertrans	147.7	0.24526	32.936	66.3249	0.493894
2600	G	C	618	partially functional	39.65	0.0871681	21.3293	78.2637	0.319846
2601	G	T	618	partially functional	39.65	0.0871681	21.3293	78.2637	0.319846
2607	G	A	619	functional	128.15	0.847271	28.0578	69.011	2.08395
2608	G	C	619	functional	125.3	3.11238	41.9042	51.1819	3.80147
2609	G	T	619	functional	123.25	9.51169	63.5942	23.395	3.49916
2612	A	C	620	functional	130	4.17094	50.8125	41.6017	3.41488
2613	A	G	620	partially functional	48.75	7.78943	52.0793	34.9098	5.22141
2614	A	T	620	functional	135.85	1.38228	75.4702	22.7312	0.416336
2616	T	A	621	supertrans	150.4	0.302895	24.6711	74.1161	0.909948
2618	T	G	621	supertrans	150.4	0.302895	24.6711	74.1161	0.909948
2624	G	A	622	functional	83.1	2.94224	39.6135	53.4726	3.9716
2625	G	C	622	partially functional	74.35	4.35762	53.0866	39.3275	3.2282
2626	G	T	622	non-functional	7.65	6.536	72.0475	19.6352	1.78127
2629	A	C	623	non-functional	19.25	3.36733	61.1983	33.5863	1.84803
2630	A	G	623	functional	109.2	6.88253	62.1149	27.91	3.09252
2631	A	T	623	non-functional	7.45	2.64039	79.1171	17.6534	0.589152
2633	C	A	624	partially functional	54.25	2.61026	35.1438	57.9423	4.30359
2634	C	G	624	partially functional	54.25	2.61026	35.1438	57.9423	4.30359
2643	A	G	625	functional	139.65	2.21416	60.0318	36.4111	1.34296
2647	G	A	626	functional	129.7	0.244988	7.34083	89.4296	2.98456
2648	G	C	626	non-functional	0	0.55778	37.1963	61.3263	0.919623
2649	G	T	626	functional	120.05	2.52876	62.0369	34.0466	1.38781
2651	A	C	627	functional	106.7	0.968247	39.163	58.4243	1.44445
2653	A	T	627	functional	106.7	0.968247	39.163	58.4243	1.44445
2657	A	C	628	functional	130.55	0.560862	12.45	83.2393	3.74986
2658	A	G	628	functional	108.8	1.1614	15.6368	77.4494	5.75244
2659	A	T	628	supertrans	143.45	2.77461	37.3566	55.7295	4.13923
2660	A	C	629	functional	127.75	0.181546	18.061	80.9438	0.813634
2661	A	G	629	functional	138.65	0.823385	22.3241	74.1187	2.73373
2662	A	T	629	functional	132.4	1.20635	48.7936	48.7936	1.20635
2665	C	A	630	functional	106.7	0.745836	12.265	82.0026	4.98658
2666	C	G	630	functional	106.7	0.745836	12.265	82.0026	4.98658
2673	A	C	631	non-functional	14.5	8.69369	58.1251	28.8641	4.31716
2674	A	G	631	partially functional	23.35	3.22888	32.2055	58.6822	5.88341
2675	A	T	631	functional	126.6	2.61026	35.1438	57.9423	4.30359
2678	C	A	632	functional	120.9	4.98752	45.0125	45.0125	4.98752
2679	C	G	632	functional	126.6	2.61026	35.1438	57.9423	4.30359
2680	C	T	632	partially functional	21.15	4.15863	45.8414	45.8414	4.15863
2689	T	A	634	non-functional	10.5	2.72434	54.7199	40.5375	2.01824
2690	T	C	634	functional	117.75	1.32985	48.6702	48.6702	1.32985
2691	T	G	634	partially functional	25.55	2.01026	60.2357	36.5348	1.21929
2692	T	A	635	functional	109.35	0.868559	26.0256	70.7449	2.36099
2693	T	C	635	functional	127.65	0.186193	83.0156	16.7606	0.0375917
2694	T	G	635	partially functional	29.25	1.41342	77.1701	21.0313	0.385202
2695	T	A	636	functional	117.75	1.32985	48.6702	48.6702	1.32985
2697	T	G	636	functional	117.75	1.32985	48.6702	48.6702	1.32985
2704	C	G	637	non-functional	2.6	38.3791	34.7268	12.7753	14.1189
2706	G	A	638	non-functional	0	2.30049	37.8307	56.4368	3.43193
2707	G	C	638	non-functional	2.95	6.39203	70.4605	21.2223	1.92524
2708	G	T	638	non-functional	0	5.18718	69.8388	23.2473	1.72666
2717	C	A	640	partially functional	50.9	3.81273	69.2931	25.4915	1.40263
2718	C	G	640	non-functional	17.9	3.91287	71.1131	23.6715	1.30248
2719	C	T	640	partially functional	20.9	2.68325	59.5627	36.1266	1.62747
2720	A	C	641	functional	135.15	4.26951	85.7554	9.50197	0.473075
2721	A	G	641	non-functional	8.25	3.46711	69.6387	25.6187	1.27548
2722	A	T	641	non-functional	14.05	4.98658	82.0026	12.265	0.745836
2724	T	A	642	functional	102.75	0.0568832	68.9406	30.977	0.0255593
2726	T	G	642	functional	102.75	0.0568832	68.9406	30.977	0.0255593
2735	A	C	643	non-functional	1.2	4.57312	50.4103	41.2724	3.74415
2736	A	G	643	non-functional	9.6	3.74415	41.2724	50.4103	4.57312
2737	A	T	643	partially functional	62.3	3.2282	39.3275	53.0866	4.35762
2738	G	A	644	non-functional	14.1	3.33782	36.7934	54.8893	4.97945
2739	G	C	644	partially functional	32.75	2.2941	30.8871	62.199	4.61974
2740	G	T	644	non-functional	15.85	5.67203	56.5739	34.3138	3.44026
2743	T	A	645	non-functional	1.2	4.57312	50.4103	41.2724	3.74415
2745	T	G	645	non-functional	1.2	4.57312	50.4103	41.2724	3.74415
2754	G	A	646	non-functional	1.15	1.90209	31.2791	62.9884	3.83033
2755	G	C	646	non-functional	6.65	1.57365	31.6076	63.6498	3.16894
2756	G	T	646	non-functional	6.65	1.57365	31.6076	63.6498	3.16894
2760	T	A	647	non-functional	10	5.69134	69.3347	23.0795	1.89448
2761	T	C	647	partially functional	66	3.28422	44.2179	48.8683	3.62962
2762	T	G	647	non-functional	0	6.08041	67.0254	24.6573	2.23686
2772	G	A	649	functional	115.95	0.267645	26.6265	72.3783	0.727535
2773	G	C	649	functional	94.25	1.54168	25.3525	68.9151	4.19073
2774	G	T	649	functional	94.25	1.54168	25.3525	68.9151	4.19073
2777	T	A	650	supertrans	141.3	7.48388	67.5421	22.4828	2.49117
2778	T	C	650	functional	107.2	1.94054	43.0761	52.6132	2.37018
2779	T	G	650	non-functional	11.3	4.00813	72.8443	21.9403	1.20723
2790	G	A	652	non-functional	0.3	1.90209	31.2791	62.9884	3.83033
2791	G	C	652	functional	105.95	3.9553	29.2259	58.8538	7.96499
2792	G	T	652	functional	105.95	3.9553	29.2259	58.8538	7.96499
2793	T	A	653	non-functional	11.1	3.91287	71.1131	23.6715	1.30248
2794	T	C	653	functional	114.5	0.942456	46.5596	51.4563	1.04157
2795	T	G	653	functional	123.15	3.15139	69.9545	25.7348	1.15933
2804	C	A	655	non-functional	0.4	16.6873	50.1315	24.8945	8.28668
2805	C	G	655	partially functional	69.35	16.7405	45.5054	27.6004	10.1536
2806	C	T	655	non-functional	16.7	17.3644	47.2013	25.9046	9.52977
2808	C	A	656	non-functional	15.25	21.1313	51.9746	19.1204	7.77377
2809	C	G	656	non-functional	0	25.5006	51.3519	15.4669	7.68063
2810	C	T	656	non-functional	16.85	6.92012	76.2817	15.401	1.39715
2817	T	A	658	non-functional	0	25.7947	57.4071	11.5903	5.20786
2818	T	C	658	non-functional	1.35	17.3644	47.2013	25.9046	9.52977
2819	T	G	658	non-functional	0.5	37.483	50.5967	6.84752	5.07277
2820	A	C	659	non-functional	0	16.726	67.8274	12.391	3.05557
2821	A	G	659	non-functional	2.25	28.4744	57.3405	9.47831	4.70679
2822	A	T	659	functional	136.5	7.5888	27.8456	50.7379	13.8277
2830	G	A	661	supertrans	141.05	0.632479	28.2726	69.5393	1.55565
2831	G	C	661	functional	139.9	0.823385	22.3241	74.1187	2.73373
2833	A	C	662	functional	111.1	2.94224	39.6135	53.4726	3.9716
2834	A	G	662	partially functional	41.35	4.98752	45.0125	45.0125	4.98752
2835	A	T	662	supertrans	187.1	9.97315	54.5925	29.961	5.47338
2837	G	C	663	supertrans	214.1	1.29259	12.8925	77.9952	7.81971
2838	G	T	663	supertrans	214.1	1.29259	12.8925	77.9952	7.81971
2842	C	A	664	supertrans	158.45	0.052318	42.5034	57.3736	0.0706219
2843	C	G	664	supertrans	150	0.268592	39.8626	59.4681	0.400693
2844	C	T	664	supertrans	145.25	0.693765	41.862	56.5078	0.936485
2846	C	A	665	supertrans	158.9	0.693765	41.862	56.5078	0.936485
2847	C	G	665	supertrans	154.45	1.86741	50.6305	45.8124	1.68971
2848	C	T	665	functional	102.85	5.23669	47.2612	42.7637	4.73836
2853	C	A	667	partially functional	33.15	11.2243	55.5945	27.6074	5.57384
2854	C	G	667	partially functional	63.8	10.4562	51.7898	31.4121	6.34199
2855	C	T	667	partially functional	51.1	11.7784	52.7872	28.9702	6.46413
2856	C	A	668	non-functional	13.4	15.6567	57.4491	21.1344	5.75978
2857	C	G	668	partially functional	31.5	16.4591	60.3934	18.1901	4.95739
2858	C	T	668	partially functional	29.4	6.31154	76.8903	15.5239	1.27428
2868	G	A	670	partially functional	40.55	1.14437	34.29	62.4805	2.08518
2869	G	C	670	functional	102.3	0.0820447	33.0992	66.6536	0.165218
2871	A	C	671	functional	107.45	1.14872	51.3492	46.4627	1.03941
2872	A	G	671	functional	96.6	2.72434	54.7199	40.5375	2.01824
2873	A	T	671	functional	98.8	4.61974	62.199	30.8871	2.2941
2876	G	C	672	functional	108.8	1.18441	23.7896	71.4678	3.55817
2877	G	T	672	functional	108.8	1.18441	23.7896	71.4678	3.55817
2885	G	A	673	functional	91.65	0.130968	11.7893	87.112	0.967727
2886	G	C	673	functional	88.75	1.15933	25.7348	69.9545	3.15139
2887	G	T	673	functional	110.8	6.57338	35.9824	48.5711	8.87314
2888	T	A	674	supertrans	150.8	38.1054	42.113	10.3849	9.39668
2889	T	C	674	supertrans	151.15	10.1733	37.3288	41.2547	11.2432
2890	T	G	674	supertrans	149.4	32.7051	44.1473	13.2969	9.8506
2897	G	A	676	functional	109.5	4.10021	24.8048	61.0101	10.0849
2898	G	C	676	functional	100.55	10.0304	44.953	36.8044	8.21218
2899	G	T	676	functional	83.25	10.6279	31.9279	43.0981	14.3461
2901	G	A	677	functional	120.1	4.37819	35.753	53.3373	6.53149
2902	G	C	677	functional	105.2	3.57549	19.572	64.9814	11.871
2903	G	T	677	functional	102.75	5.45484	44.5452	44.5452	5.45484
2912	T	A	679	functional	93.75	0.444194	32.737	65.9243	0.894497
2913	T	C	679	partially functional	24.85	0.148033	59.7207	40.032	0.0992294
2914	T	G	679	supertrans	156.9	0.519892	28.3852	69.8162	1.27873
2915	C	A	680	partially functional	41.95	8.49245	51.3763	34.4386	5.69266
2916	C	G	680	functional	106.85	1.83446	40.7213	54.968	2.47626
2917	C	T	680	partially functional	33.2	6.79083	55.4551	33.6352	4.11885
2926	G	A	682	partially functional	40.65	1.05333	25.8408	70.2426	2.86324
2927	G	C	682	functional	87.55	3.33782	36.7934	54.8893	4.97945
2928	G	T	682	functional	101.7	8.47473	62.6202	25.4595	3.44557
2931	A	C	683	functional	79.8	0.944239	51.5537	46.6477	0.854382
2932	A	G	683	functional	78.7	0.116343	57.3279	42.4696	0.086189
2933	A	T	683	functional	84.75	18.737	56.289	18.737	6.237
2934	C	A	684	functional	86.1	0.264815	19.5168	79.1445	1.07388
2935	C	G	684	functional	86.1	0.264815	19.5168	79.1445	1.07388
2942	T	A	685	partially functional	67.9	2.95207	59.2939	35.9635	1.79052
2943	T	C	685	partially functional	30.65	4.19073	68.9151	25.3525	1.54168
2944	T	G	685	partially functional	51.65	10.4371	69.7813	17.2079	2.57376
2948	G	A	686	partially functional	69.25	1.5075	27.3975	67.3871	3.70785
2949	G	C	686	partially functional	67.9	2.95207	59.2939	35.9635	1.79052
2950	G	T	686	functional	117.65	0.854382	46.6477	51.5537	0.944239
2955	T	G	687	partially functional	63.95	3.29294	54.1513	40.1163	2.43947
2960	A	C	688	partially functional	30.75	8.69369	58.1251	28.8641	4.31716
2961	A	G	688	partially functional	69.7	5.95232	29.482	53.7198	10.8458
2962	A	T	688	partially functional	62.85	2.61026	35.1438	57.9423	4.30359
2965	C	A	689	partially functional	42	16.5906	33.4094	33.4094	16.5906
2966	C	G	689	partially functional	62.85	2.61026	35.1438	57.9423	4.30359
2967	C	T	689	functional	94.45	4.15863	45.8414	45.8414	4.15863
2974	A	C	691	non-functional	12.35	20.7155	46.1033	22.8942	10.287
2975	A	G	691	partially functional	48.35	2.94717	32.4872	59.1955	5.3701
2976	A	T	691	partially functional	50.5	8.73913	29.0149	47.8375	14.4084
2978	C	A	692	partially functional	47.55	13.4471	36.5529	36.5529	13.4471
2979	C	G	692	partially functional	50.5	8.73913	29.0149	47.8375	14.4084
2980	C	T	692	functional	103.6	11.5738	38.4262	38.4262	11.5738
2989	A	C	694	non-functional	0	1.99845	26.9066	66.1796	4.91539
2990	A	G	694	functional	119.85	0.244212	17.9983	80.663	1.09448
2991	A	T	694	non-functional	13.75	10.4202	34.5964	42.2561	12.7273
2992	T	A	695	non-functional	1	4.00813	72.8443	21.9403	1.20723
2993	T	C	695	non-functional	4.6	2.99592	54.4483	40.3363	2.21943
2994	T	G	695	non-functional	0	3.70785	67.3871	27.3975	1.5075
2996	C	G	696	partially functional	68.5	1.13209	27.773	68.3105	2.78449
3004	C	A	697	partially functional	59.65	3.81273	69.2931	25.4915	1.40263
3005	C	G	697	non-functional	0.6	4.3008	70.7252	23.5424	1.43161
3006	C	T	697	functional	123	2.01026	60.2357	36.5348	1.21929
3008	A	C	698	functional	120.25	11.713	78.3119	8.67721	1.29784
3009	A	G	698	functional	93.85	5.54568	67.5602	24.854	2.04014
3010	A	T	698	supertrans	149.25	0.144298	86.8449	12.9893	0.0215824
3012	C	A	699	partially functional	52.4	3.27226	65.7252	29.5322	1.47032
3013	C	G	699	partially functional	52.4	3.27226	65.7252	29.5322	1.47032
3020	T	A	700	non-functional	0	19.2592	63.9427	12.9098	3.88836
3021	T	C	700	non-functional	0.1	17.3644	47.2013	25.9046	9.52977
3022	T	G	700	non-functional	12.8	8.02608	80.0536	10.8341	1.08621
3025	A	C	701	non-functional	0.8	26.2137	58.3397	10.6577	4.78882
3026	A	G	701	non-functional	10.55	26.6048	59.2101	9.78736	4.39774
3027	A	T	701	functional	135.35	0.429763	35.0046	63.7826	0.78308
3039	A	C	703	functional	75.55	7.5888	27.8456	50.7379	13.8277
3040	A	G	703	partially functional	37.6	4.19517	20.7788	62.423	12.603
3041	A	T	703	partially functional	35.75	19.0607	38.3835	28.4352	14.1205
3043	A	C	704	functional	113.65	7.9386	32.1926	48.0258	11.843
3044	A	G	704	functional	123.2	3.76599	33.9881	56.0369	6.20906
3045	A	T	704	partially functional	70.9	27.6895	41.3079	18.5608	12.4417
3048	C	A	705	functional	136.3	1.95154	19.465	71.4227	7.16076
3049	C	G	705	functional	136.3	1.95154	19.465	71.4227	7.16076
3058	T	A	706	functional	126.3	36.8044	44.953	10.0304	8.21218
3059	T	C	706	non-functional	11.9	12.152	40.346	36.5065	10.9956
3060	T	G	706	non-functional	3.1	52.2098	38.6779	3.87781	5.23449
3063	A	C	707	non-functional	13.55	35.4072	47.7947	9.64958	7.14858
3064	A	G	707	non-functional	0.45	24.8697	55.3486	13.6488	6.1328
3065	A	T	707	functional	129.8	0.172043	14.0131	84.7741	1.0408
3080	A	C	709	partially functional	40.6	17.0781	23.0531	34.3912	25.4776
3081	A	G	709	partially functional	28.1	22.5083	27.4917	27.4917	22.5083
3082	A	T	709	partially functional	40.6	17.0781	23.0531	34.3912	25.4776
3085	T	A	710	non-functional	17.4	48.915	29.6685	8.0856	13.3309
3086	T	C	710	partially functional	51.15	38.3791	34.7268	12.7753	14.1189
3087	T	G	710	partially functional	50.35	56.4106	25.3469	5.65566	12.5869
3090	G	A	711	non-functional	0.35	19.1572	25.8594	31.5848	23.3986
3091	G	C	711	non-functional	0.35	19.1572	25.8594	31.5848	23.3986
3092	G	T	711	non-functional	0.35	19.1572	25.8594	31.5848	23.3986
3100	T	A	712	non-functional	12.8	61.0101	24.8048	4.10021	10.0849
3101	T	C	712	non-functional	0.4	72.8443	21.9403	1.20723	4.00813
3102	T	G	712	non-functional	13.1	75.6202	15.2675	1.5307	7.5816
3106	G	A	713	non-functional	14.45	63.7634	28.6508	2.3518	5.23402
3107	G	C	713	non-functional	12.8	61.0101	24.8048	4.10021	10.0849
3108	G	T	713	non-functional	0	63.2587	28.424	2.57857	5.7387
3112	T	G	714	non-functional	0	65.7018	26.7124	2.19268	5.39313
3125	A	C	715	functional	139.2	18.2442	36.7392	30.0795	14.9371
3126	A	G	715	non-functional	14.15	14.2202	25.911	38.6546	21.2141
3127	A	T	715	functional	97.95	35.0785	31.7403	15.7618	17.4195
3132	A	C	716	non-functional	0.9	19.483	35.5004	29.0653	15.9513
3133	A	G	716	non-functional	16.1	19.8201	32.6778	29.5681	17.934
3134	A	T	716	non-functional	11.1	43.2079	35.3756	9.64098	11.7755
3135	C	A	717	non-functional	16.4	12.487	37.513	37.513	12.487
3136	C	G	717	non-functional	16.4	12.487	37.513	37.513	12.487
3145	A	C	718	partially functional	32.8	14.7873	40.1961	32.9098	12.1068
3146	A	G	718	non-functional	12.6	20.2649	24.7517	30.2317	24.7517
3147	A	T	718	partially functional	64.5	13.1934	29.3624	39.6351	17.8092
3149	G	A	719	partially functional	52.95	8.59471	31.5365	47.047	12.8218
3150	G	C	719	partially functional	34.1	7.68063	25.5006	51.3519	15.4669
3151	G	T	719	partially functional	40.8	20.654	41.592	25.2268	12.5273
3153	T	A	720	partially functional	32.8	14.7873	40.1961	32.9098	12.1068
3155	T	G	720	partially functional	32.8	14.7873	40.1961	32.9098	12.1068
3162	T	A	721	non-functional	0	11.0099	22.1713	44.6475	22.1713
3163	T	C	721	non-functional	0	35.8427	24.0261	16.1052	24.0261
3164	T	G	721	non-functional	11.25	8.35502	20.55	50.5449	20.55
3168	C	A	722	non-functional	0	35.8427	24.0261	16.1052	24.0261
3169	C	G	722	non-functional	0	18.1099	24.4458	32.9984	24.4458
3170	C	T	722	non-functional	0	40.1895	22.0565	13.3779	24.3762
3182	T	A	724	non-functional	0	59.2101	26.6048	4.39774	9.78736
3183	T	C	724	non-functional	0	85.3298	9.45481	0.520234	4.69512
3184	T	G	724	non-functional	0	40.9146	49.9731	5.01025	4.10205
3185	G	A	725	non-functional	0	83.9931	8.42105	0.691242	6.89458
3186	G	C	725	non-functional	0	59.2101	26.6048	4.39774	9.78736
3187	G	T	725	non-functional	7.1	82.5373	9.1454	0.829652	7.48762
3190	C	G	726	non-functional	10.35	83.9931	8.42105	0.691242	6.89458
3198	A	C	727	non-functional	0	5.69266	34.4386	51.3763	8.49245
3199	A	G	727	partially functional	70.15	1.95829	48.0417	48.0417	1.95829
3200	A	T	727	non-functional	0	5.69266	34.4386	51.3763	8.49245
3201	T	A	728	functional	135.9	24.3629	54.2206	14.7768	6.63966
3202	T	C	728	non-functional	13.95	22.6647	50.4412	18.5563	8.33787
3203	T	G	728	functional	133.9	16.1729	65.5845	14.6339	3.60867
3206	G	A	729	functional	77.15	3.74415	41.2724	50.4103	4.57312
3207	G	C	729	functional	77.15	3.74415	41.2724	50.4103	4.57312
3208	G	T	729	functional	77.15	3.74415	41.2724	50.4103	4.57312
3216	G	A	730	non-functional	0	15.893	39.0904	32.0045	13.0121
3217	G	C	730	non-functional	1.8	12.603	62.423	20.7788	4.19517
3218	G	T	730	non-functional	0	29.0653	35.5004	19.483	15.9513
3220	G	A	731	non-functional	0.15	9.61483	52.6311	31.9224	5.83169
3221	G	C	731	non-functional	0	16.2757	36.2222	32.7752	14.7269
3222	G	T	731	non-functional	0	39.3871	35.6389	11.8632	13.1108
3236	G	A	733	non-functional	0	8.49303	46.4904	38.0631	6.9535
3237	G	C	733	non-functional	0.75	6.83659	68.1894	22.6983	2.2757
3238	G	T	733	non-functional	0	11.7784	52.7872	28.9702	6.46413
3244	G	A	734	non-functional	3.05	10.4562	51.7898	31.4121	6.34199
3245	G	C	734	non-functional	4.2	8.1091	44.3888	40.1647	7.33742
3246	G	T	734	non-functional	0	13.6867	61.3394	20.4181	4.55589
3258	A	C	736	non-functional	0	4.37819	35.753	53.3373	6.53149
3259	A	G	736	non-functional	0	5.45484	44.5452	44.5452	5.45484
3260	A	T	736	non-functional	0	4.37819	35.753	53.3373	6.53149
3261	T	A	737	non-functional	0	5.9612	72.6223	19.7919	1.62462
3262	T	C	737	non-functional	0	7.29235	65.8135	24.2114	2.6827
3263	T	G	737	non-functional	0	3.87742	77.88	17.3774	0.865169
3265	G	A	738	non-functional	0	4.91117	40.1054	48.9849	5.99851
3266	G	C	738	non-functional	0	4.91117	40.1054	48.9849	5.99851
3267	G	T	738	non-functional	0	4.91117	40.1054	48.9849	5.99851
3276	A	C	739	functional	83.5	4.17094	50.8125	41.6017	3.41488
3277	A	G	739	partially functional	26.65	2.77461	37.3566	55.7295	4.13923
3278	A	T	739	partially functional	41.5	5.5575	61.2613	30.4215	2.75977
3280	A	C	740	non-functional	0	4.17094	50.8125	41.6017	3.41488
3281	A	G	740	functional	115.55	3.9824	48.5155	43.8987	3.60342
3282	A	T	740	non-functional	0	7.16076	71.4227	19.465	1.95154
3284	C	A	741	functional	91.95	6.50542	43.4946	43.4946	6.50542
3285	C	G	741	functional	91.95	6.50542	43.4946	43.4946	6.50542
3293	C	G	742	non-functional	0	4.19073	68.9151	25.3525	1.54168
3294	C	T	742	non-functional	0	6.28725	62.7102	28.1775	2.82504
3297	G	A	743	non-functional	0	2.77461	37.3566	55.7295	4.13923
3298	G	C	743	non-functional	6.55	5.82989	71.0226	21.3916	1.75593
3299	G	T	743	non-functional	0	6.24012	68.7859	22.8968	2.07715
3313	A	G	745	non-functional	0	9.51169	63.5942	23.395	3.49916
3314	A	T	745	non-functional	0	0.836831	68.1606	30.6265	0.376012
3318	G	A	746	non-functional	12.95	2.45067	24.4435	66.4442	6.66162
3319	G	C	746	non-functional	0	7.13653	52.7322	35.3475	4.78376
3320	G	T	746	non-functional	0	4.89783	59.6678	32.7464	2.68799
3326	G	C	747	non-functional	10.1	7.13653	52.7322	35.3475	4.78376
3327	G	T	747	non-functional	10.1	7.13653	52.7322	35.3475	4.78376
3341	C	A	748	partially functional	54.65	6.66521	60.1536	29.8714	3.30984
3342	C	G	748	functional	102.7	6.79083	55.4551	33.6352	4.11885
3343	C	T	748	functional	78.75	6.44045	58.1252	31.8998	3.5346
3347	C	A	749	non-functional	0	7.29235	65.8135	24.2114	2.6827
3348	C	G	749	partially functional	42.75	7.00303	69.8495	21.0383	2.10927
3349	C	T	749	non-functional	4.15	13.9764	69.2255	13.9764	2.82178
3367	A	C	751	non-functional	0.1	2.63391	26.2711	64.6166	6.47838
3368	A	G	751	partially functional	53.6	2.37351	15.869	71.1201	10.6373
3369	A	T	751	non-functional	0	10.4202	34.5964	42.2561	12.7273
3371	T	A	752	non-functional	9.75	19.1931	57.6593	17.3667	5.78086
3372	T	C	752	non-functional	13.9	10.4793	46.965	34.7925	7.76325
3373	T	G	752	non-functional	2.4	14.0637	57.0312	23.1872	5.71788
3377	C	G	753	partially functional	28.15	4.10021	24.8048	61.0101	10.0849
3388	C	A	754	functional	111.55	1.41944	11.5914	77.4989	9.49024
3389	C	G	754	functional	119.65	2.17457	16.068	72.0117	9.74573
3390	C	T	754	functional	76.65	1.07656	23.8974	71.7918	3.23417
3391	T	A	755	partially functional	57	16.6043	40.84	30.255	12.3008
3392	T	C	755	non-functional	0	37.3288	41.2547	11.2432	10.1733
3393	T	G	755	functional	79.05	20.017	44.5486	24.4488	10.9856
3403	A	C	757	non-functional	8.8	25.2268	41.592	20.654	12.5273
3404	A	G	757	non-functional	17.1	3.5346	31.8998	58.1252	6.44045
3405	A	T	757	partially functional	37.55	6.88731	30.8668	50.8907	11.3552
3407	C	A	758	partially functional	49.55	10.7083	39.2917	39.2917	10.7083
3408	C	G	758	partially functional	37.55	6.88731	30.8668	50.8907	11.3552
3409	C	T	758	partially functional	35.45	0.669346	49.3307	49.3307	0.669346
3418	A	C	760	functional	88.85	2.40411	26.5009	65.1818	5.91316
3419	A	G	760	functional	93.8	2.37351	15.869	71.1201	10.6373
3420	A	T	760	non-functional	17.65	12.1068	32.9098	40.1961	14.7873
3423	T	A	761	non-functional	13.25	49.6203	27.2322	8.20218	14.9453
3424	T	C	761	non-functional	12.05	25.8594	31.5848	23.3986	19.1572
3425	T	G	761	non-functional	0	42.5637	28.5313	11.6	17.3051
3428	C	G	762	partially functional	44.4	4.10021	24.8048	61.0101	10.0849
3435	A	C	763	functional	100.5	3.44557	25.4595	62.6202	8.47473
3436	A	G	763	functional	132.25	1.51728	16.7253	74.9575	6.79999
3437	A	T	763	non-functional	4.6	10.4202	34.5964	42.2561	12.7273
3438	T	A	764	non-functional	10.25	34.5964	42.2561	12.7273	10.4202
3439	T	C	764	non-functional	9.3	5.23449	52.2098	38.6779	3.87781
3440	T	G	764	non-functional	8.6	28.5313	42.5637	17.3051	11.6
3443	C	G	765	partially functional	51.65	2.40411	26.5009	65.1818	5.91316
3453	A	C	766	non-functional	8.35	23.6768	43.142	21.4237	11.7576
3454	A	G	766	partially functional	46	7.5888	27.8456	50.7379	13.8277
3455	A	T	766	functional	110.95	5.83169	31.9224	52.6311	9.61483
3456	C	A	767	partially functional	20.25	11.5738	38.4262	38.4262	11.5738
3457	C	G	767	partially functional	74.75	3.29294	54.1513	40.1163	2.43947
3458	C	T	767	partially functional	28.25	6.50542	43.4946	43.4946	6.50542
3465	C	A	769	functional	123.25	1.13396	18.6476	75.6199	4.59845
3466	C	G	769	non-functional	11.85	2.97697	21.997	66.0827	8.94332
3470	T	A	770	non-functional	10.95	9.64958	47.7947	35.4072	7.14858
3471	T	C	770	non-functional	15.35	14.3356	64.2479	17.5096	3.90692
3472	T	G	770	non-functional	0	10.8458	53.7198	29.482	5.95232
3484	G	A	772	non-functional	5.4	5.0264	30.408	55.4069	9.1587
3485	G	C	772	partially functional	27.15	3.9553	29.2259	58.8538	7.96499
3490	A	C	773	non-functional	0	10.3849	42.113	38.1054	9.39668
3491	A	G	773	non-functional	0	13.2969	44.1473	32.7051	9.8506
3492	A	T	773	non-functional	0	3.83033	62.9884	31.2791	1.90209
3494	A	C	774	non-functional	10.3	1.18441	23.7896	71.4678	3.55817
3496	A	T	774	non-functional	10.3	1.18441	23.7896	71.4678	3.55817
3499	G	A	775	partially functional	24.9	0.972616	32.2086	64.8602	1.95861
3500	G	C	775	non-functional	15.45	2.37129	47.6287	47.6287	2.37129
3501	G	T	775	non-functional	7.2	5.18718	69.8388	23.2473	1.72666
3504	A	C	776	non-functional	17	1.46239	53.521	43.8193	1.19731
3505	A	G	776	partially functional	27.95	1.04157	51.4563	46.5596	0.942456
3506	A	T	776	non-functional	10.75	2.73373	74.1187	22.3241	0.823385
3508	C	A	777	non-functional	0	1.47032	29.5322	65.7252	3.27226
3509	C	G	777	non-functional	0	1.47032	29.5322	65.7252	3.27226
3515	T	A	778	non-functional	0	2.75925	20.3883	67.6914	9.16104
3516	T	C	778	partially functional	73	0.505419	30.4971	67.8726	1.12483
3517	T	G	778	functional	117.8	1.26126	16.9813	76.1049	5.65258
3520	C	A	779	functional	106.2	4.17094	50.8125	41.6017	3.41488
3521	C	G	779	functional	122.55	2.03125	33.4031	60.8645	3.70117
3522	C	T	779	non-functional	12.6	7.78943	52.0793	34.9098	5.22141
3534	A	C	781	functional	107.35	0.151337	24.8227	74.5714	0.454643
3535	A	G	781	functional	115.05	1.21929	36.5348	60.2357	2.01026
3536	A	T	781	functional	112.45	2.16422	35.5898	58.6777	3.5682
3538	G	A	782	functional	108	0.0728802	19.7087	79.9228	0.295544
3539	G	C	782	supertrans	170.75	1.60038	21.5471	71.539	5.31346
3540	G	T	782	functional	93.05	5.45484	44.5452	44.5452	5.45484
3544	T	A	783	functional	107.35	0.151337	24.8227	74.5714	0.454643
3546	T	G	783	functional	107.35	0.151337	24.8227	74.5714	0.454643
3553	G	A	784	non-functional	11.9	2.60764	52.3758	42.8816	2.13495
3554	G	C	784	partially functional	39.8	18.737	56.289	18.737	6.237
3555	G	T	784	non-functional	13.75	3.70117	60.8645	33.4031	2.03125
3559	G	A	785	partially functional	28.1	3.5682	58.6777	35.5898	2.16422
3560	G	C	785	non-functional	7.95	6.25791	46.24	41.8397	5.66239
3561	G	T	785	non-functional	11.25	23.26	51.766	17.2314	7.74257
3570	A	C	787	functional	114.9	0.800564	32.3807	65.2066	1.61214
3571	A	G	787	partially functional	65.3	1.60038	21.5471	71.539	5.31346
3572	A	T	787	partially functional	57.6	2.86758	52.1158	42.6688	2.34778
3573	A	C	788	functional	115.3	3.44026	34.3138	56.5739	5.67203
3574	A	G	788	functional	93	2.68799	32.7464	59.6678	4.89783
3575	A	T	788	non-functional	0	3.48484	63.3339	31.4507	1.73052
3578	T	A	789	functional	109.65	0.492392	16.3058	80.763	2.43883
3580	T	G	789	functional	109.65	0.492392	16.3058	80.763	2.43883
3585	C	A	790	functional	106.75	0.560862	12.45	83.2393	3.74986
3586	C	G	790	functional	106.3	0.281437	13.9037	84.1123	1.70259
3589	T	A	791	functional	82.05	1.39629	51.1016	46.2387	1.26341
3590	T	C	791	functional	127.65	0.0559716	74.97	24.9554	0.0186313
3591	T	G	791	non-functional	6.65	2.21416	60.0318	36.4111	1.34296
3600	C	A	793	partially functional	56.8	1.13396	18.6476	75.6199	4.59845
3601	C	G	793	partially functional	40.95	5.78086	19.1931	57.6593	17.3667
3603	T	A	794	non-functional	0.3	3.29294	54.1513	40.1163	2.43947
3604	T	C	794	non-functional	0	60.3934	18.1901	4.95739	16.4591
3605	T	G	794	non-functional	13.35	3.70117	60.8645	33.4031	2.03125
3615	G	A	796	non-functional	12.25	54.8484	20.1776	6.71654	18.2574
3616	G	C	796	non-functional	12.25	54.8484	20.1776	6.71654	18.2574
3621	G	A	797	non-functional	1.15	44.6475	22.1713	11.0099	22.1713
3622	G	C	797	partially functional	65.25	27.5603	24.9376	22.5645	24.9376
3623	G	T	797	non-functional	0	4.3008	70.7252	23.5424	1.43161
3632	C	G	799	non-functional	0.2	8.71443	64.3914	23.6883	3.20586
3633	C	T	799	non-functional	1	0.170605	68.8268	30.9259	0.0766576
3634	G	A	800	partially functional	21.45	1.90326	38.228	57.0294	2.83933
3635	G	C	800	non-functional	0	11.871	64.9814	19.572	3.57549
3636	G	T	800	partially functional	25.7	3.91287	71.1131	23.6715	1.30248
3644	A	C	802	functional	118.65	1.84803	33.5863	61.1983	3.36733
3645	A	G	802	functional	113.2	1.41497	12.7701	77.2548	8.56008
3646	A	T	802	partially functional	67.1	3.5682	58.6777	35.5898	2.16422
3648	A	C	803	functional	78.5	2.21943	40.3363	54.4483	2.99592
3649	A	G	803	functional	122.2	1.96901	35.7851	58.9996	3.24635
3650	A	T	803	partially functional	20.25	5.54568	67.5602	24.854	2.04014
3651	C	A	804	functional	88.25	0.726047	32.4552	65.3567	1.46208
3652	C	G	804	functional	88.25	0.726047	32.4552	65.3567	1.46208
3659	A	C	805	partially functional	35.3	3.15188	51.8315	42.4361	2.58054
3660	A	G	805	partially functional	66.15	4.49043	40.5262	49.4988	5.48462
3661	A	T	805	functional	112.7	0.0259964	42.5298	57.4092	0.0350915
3663	G	A	806	partially functional	67.25	2.30049	37.8307	56.4368	3.43193
3664	G	C	806	functional	80.8	1.73052	31.4507	63.3339	3.48484
3665	G	T	806	functional	87.15	3.5682	58.6777	35.5898	2.16422
3667	C	A	807	partially functional	35.3	3.15188	51.8315	42.4361	2.58054
3668	C	G	807	partially functional	35.3	3.15188	51.8315	42.4361	2.58054
3676	T	A	808	non-functional	10.7	3.29294	54.1513	40.1163	2.43947
3677	T	C	808	non-functional	18.5	25	25	25	25
3678	T	G	808	non-functional	14.45	3.24635	58.9996	35.7851	1.96901
3679	T	A	809	functional	122.6	1.54168	25.3525	68.9151	4.19073
3680	T	C	809	non-functional	0	4.76948	78.4324	15.8352	0.962941
3681	T	G	809	non-functional	0	4.50473	74.0788	20.1888	1.22768
3682	T	A	810	non-functional	18.5	25	25	25	25
3684	T	G	810	non-functional	18.5	25	25	25	25
3694	G	A	811	partially functional	23.4	2.03125	33.4031	60.8645	3.70117
3695	G	C	811	partially functional	50.3	1.90209	31.2791	62.9884	3.83033
3701	A	C	812	partially functional	68.05	3.0094	49.4885	44.7791	2.72302
3702	A	G	812	functional	78.35	34.3912	23.0531	17.0781	25.4776
3703	A	T	812	non-functional	17	3.83033	62.9884	31.2791	1.90209
3705	G	C	813	functional	132	6.237	18.737	56.289	18.737
3706	G	T	813	functional	132	6.237	18.737	56.289	18.737
3711	G	A	814	non-functional	17.2	1.90209	31.2791	62.9884	3.83033
3712	G	C	814	non-functional	18.8	7.10626	26.075	52.5085	14.3102
3713	G	T	814	non-functional	18.8	7.10626	26.075	52.5085	14.3102
3714	T	A	815	non-functional	8.3	11.5889	63.4371	21.1164	3.85761
3715	T	C	815	partially functional	35.6	1.68971	45.8124	50.6305	1.86741
3716	T	G	815	non-functional	0.9	3.46711	69.6387	25.6187	1.27548
3728	C	A	817	non-functional	10.25	3.12237	56.7464	38.0382	2.09299
3729	C	G	817	non-functional	9.25	4.19073	68.9151	25.3525	1.54168
3730	C	T	817	non-functional	0.35	4.19073	68.9151	25.3525	1.54168
3737	G	A	818	non-functional	0	0.0829401	49.9171	49.9171	0.0829401
3738	G	C	818	non-functional	0	4.4055	72.447	21.8206	1.32691
3739	G	T	818	non-functional	0	4.3008	70.7252	23.5424	1.43161
3750	G	A	820	supertrans	150.95	0.197908	9.77714	88.2388	1.78612
3751	G	C	820	non-functional	4.35	2.72458	22.2494	66.8409	8.1851
3752	G	T	820	non-functional	0	9.11395	33.4418	45.1417	12.3025
3754	T	A	821	non-functional	0	4.68668	77.0708	17.1968	1.04574
3755	T	C	821	non-functional	5.75	14.7269	32.7752	36.2222	16.2757
3756	T	G	821	non-functional	3.45	49.9327	30.2857	7.46836	12.3132
3766	T	A	823	non-functional	0.05	4.06985	81.745	13.5124	0.672741
3767	T	C	823	non-functional	3	89.3512	5.43345	0.298966	4.91639
3768	T	G	823	non-functional	0	82.6057	8.28196	0.830339	8.28196
3771	G	A	824	non-functional	0	85.4038	7.01037	0.575446	7.01037
3772	G	C	824	non-functional	0.05	4.06985	81.745	13.5124	0.672741
3773	G	T	824	non-functional	0	84.0572	7.6255	0.69177	7.6255
3776	T	G	825	non-functional	0	86.0248	6.38937	0.524471	7.06135
3785	G	A	826	functional	79.8	0.24526	32.936	66.3249	0.493894
3786	G	C	826	non-functional	0	4.13923	55.7295	37.3566	2.77461
3787	G	T	826	functional	101.5	2.14347	28.8591	64.2271	4.77037
3789	C	A	827	non-functional	0	7.44689	45.051	40.7639	6.73822
3790	C	G	827	non-functional	0	2.58054	42.4361	51.8315	3.15188
3791	C	T	827	partially functional	37.1	3.33782	36.7934	54.8893	4.97945
3797	T	A	829	functional	104.5	5.93311	79.8818	13.2044	0.980736
3798	T	C	829	non-functional	0	5.43345	89.3512	4.91639	0.298966
3799	T	G	829	non-functional	12.05	6.28383	84.6039	8.48229	0.63001
3800	G	A	830	non-functional	0.2	6.38937	86.0248	7.06135	0.524471
3801	G	C	830	functional	104.5	5.93311	79.8818	13.2044	0.980736
3802	G	T	830	non-functional	0	6.3388	85.3439	7.74223	0.575043
3805	T	G	831	non-functional	0	6.38937	86.0248	7.06135	0.524471
3810	C	A	832	non-functional	0	3.48484	63.3339	31.4507	1.73052
3811	C	G	832	non-functional	11.45	3.24635	58.9996	35.7851	1.96901
3812	C	T	832	non-functional	1.35	3.36733	61.1983	33.5863	1.84803
3815	C	A	833	non-functional	0	4.19073	68.9151	25.3525	1.54168
3816	C	G	833	non-functional	1.35	3.6448	73.2077	22.0497	1.09779
3817	C	T	833	non-functional	2.4	7.5816	75.6202	15.2675	1.5307
3830	G	A	835	non-functional	3.15	5.18718	69.8388	23.2473	1.72666
3831	G	C	835	non-functional	3.15	5.18718	69.8388	23.2473	1.72666
3832	G	T	835	non-functional	6.1	5.18718	69.8388	23.2473	1.72666
3833	G	A	836	non-functional	0.2	4.61974	62.199	30.8871	2.2941
3834	G	C	836	non-functional	0	3.62962	48.8683	44.2179	3.28422
3835	G	T	836	non-functional	0	5.18718	69.8388	23.2473	1.72666
3844	A	G	838	non-functional	10.2	3.81273	69.2931	25.4915	1.40263
3849	G	A	839	non-functional	0.65	1.54168	25.3525	68.9151	4.19073
3850	G	C	839	non-functional	0	3.43193	56.4368	37.8307	2.30049
3851	G	T	839	non-functional	0.05	4.3008	70.7252	23.5424	1.43161
3852	A	C	840	non-functional	11.85	3.43193	56.4368	37.8307	2.30049
3854	A	T	840	non-functional	11.85	3.43193	56.4368	37.8307	2.30049
3856	G	A	841	non-functional	0	2.43947	40.1163	54.1513	3.29294
3857	G	C	841	non-functional	0	0.0780392	57.3662	42.4979	0.0578128
3858	G	T	841	non-functional	6.3	2.53789	76.0456	20.7248	0.691656
3862	A	C	842	non-functional	0	3.70117	60.8645	33.4031	2.03125
3863	A	G	842	non-functional	9	8.97715	60.0203	26.9689	4.03369
3864	A	T	842	non-functional	0	4.68668	77.0708	17.1968	1.04574
3865	C	A	843	non-functional	2.8	2.16422	35.5898	58.6777	3.5682
3866	C	G	843	non-functional	2.8	2.16422	35.5898	58.6777	3.5682
3878	C	G	844	non-functional	0	5.05442	68.0514	25.0347	1.85942
3879	C	T	844	non-functional	0	4.77037	64.2271	28.8591	2.14347
3883	G	A	845	partially functional	30.5	2.30049	37.8307	56.4368	3.43193
3884	G	C	845	non-functional	0	5.31346	71.539	21.5471	1.60038
3886	G	T	845	functional	77.9	11.5889	63.4371	21.1164	3.85761
3899	C	A	847	functional	100.75	1.44445	58.4243	39.163	0.968247
3900	C	G	847	partially functional	69.6	1.3149	71.791	26.4104	0.483724
3901	C	T	847	functional	99.2	0.0181635	73.0877	26.8875	0.00668199
3903	G	A	848	non-functional	0	2.86621	47.1338	47.1338	2.86621
3904	G	C	848	non-functional	2.35	5.31346	71.539	21.5471	1.60038
3905	G	T	848	functional	103.45	1.48854	73.5375	24.4785	0.495492
3915	A	C	850	non-functional	7.4	3.12237	56.7464	38.0382	2.09299
3916	A	G	850	functional	122.45	0.788327	26.1058	70.963	2.1429
3917	A	T	850	supertrans	148.25	3.38228	27.6203	61.47	7.5274
3921	C	A	851	functional	97.7	2.03125	33.4031	60.8645	3.70117
3922	C	G	851	functional	119.1	2.34778	42.6688	52.1158	2.86758
3923	C	T	851	functional	125.45	4.95739	18.1901	60.3934	16.4591
3932	G	A	853	non-functional	4.35	6.46413	28.9702	52.7872	11.7784
3933	G	C	853	functional	118.6	4.31716	28.8641	58.1251	8.69369
3936	A	C	854	functional	94	3.0094	49.4885	44.7791	2.72302
3937	A	G	854	non-functional	18.4	19.0607	38.3835	28.4352	14.1205
3938	A	T	854	non-functional	8.85	1.77718	65.0416	32.2987	0.882521
3941	G	C	855	partially functional	67.25	0.602548	24.3714	73.2159	1.81015
3942	G	T	855	partially functional	67.25	0.602548	24.3714	73.2159	1.81015
3948	G	A	856	non-functional	15.8	0.942448	34.4919	62.8484	1.71725
3949	G	C	856	non-functional	13.7	0.882521	32.2987	65.0416	1.77718
3952	A	C	857	non-functional	2.65	1.39629	51.1016	46.2387	1.26341
3953	A	G	857	non-functional	0.05	1.52784	55.9164	41.4239	1.13185
3954	A	T	857	non-functional	6.1	1.77718	65.0416	32.2987	0.882521
3956	A	C	858	non-functional	4.8	0.664233	24.3098	73.0305	1.99547
3958	A	T	858	non-functional	4.8	0.664233	24.3098	73.0305	1.99547
3963	G	A	859	functional	119.9	2.57376	17.2079	69.7813	10.4371
3964	G	C	859	supertrans	143.9	1.22768	20.1888	74.0788	4.50473
3966	A	C	860	supertrans	150.55	2.09299	38.0382	56.7464	3.12237
3967	A	G	860	functional	124.8	2.60768	47.3923	47.3923	2.60768
3968	A	T	860	functional	117.65	7.78943	52.0793	34.9098	5.22141
3970	G	C	861	functional	133.65	0.112428	16.6857	82.645	0.556858
3971	G	T	861	functional	133.65	0.112428	16.6857	82.645	0.556858
3975	A	C	862	functional	130.45	1.61169	53.3717	43.6971	1.31954
3976	A	G	862	partially functional	29.3	1.29606	38.8352	57.9353	1.93349
3977	A	T	862	supertrans	157.1	1.77718	65.0416	32.2987	0.882521
3978	A	C	863	supertrans	142.7	1.61169	53.3717	43.6971	1.31954
3979	A	G	863	functional	138.45	1.69544	50.8025	45.968	1.5341
3980	A	T	863	functional	123.6	2.53789	76.0456	20.7248	0.691656
3981	T	A	864	functional	114.2	1.61477	48.3852	48.3852	1.61477
3983	T	G	864	functional	114.2	1.61477	48.3852	48.3852	1.61477
3989	C	A	865	functional	135.4	0.183887	6.72995	90.6103	2.47581
3990	C	G	865	supertrans	146.45	0.222357	7.36346	89.7053	2.70887
3991	C	T	865	supertrans	184.8	0.00300846	0.736146	98.8568	0.404005
3993	T	A	866	supertrans	153.6	0.322149	9.6529	87.1176	2.9074
3994	T	C	866	functional	75.45	1.14437	34.29	62.4805	2.08518
3995	T	G	866	functional	139.45	0.806547	24.1674	72.603	2.423
4006	C	A	868	functional	138.75	0.847271	28.0578	69.011	2.08395
4007	C	G	868	functional	110.35	1.53883	50.9591	46.1097	1.39239
4008	C	T	868	functional	134.2	1.53883	50.9591	46.1097	1.39239
4011	G	A	869	supertrans	140.9	0.0137967	8.30347	91.5306	0.152083
4012	G	C	869	partially functional	48.75	1.53883	50.9591	46.1097	1.39239
4013	G	T	869	functional	138.55	1.31954	43.6971	53.3717	1.61169
4019	A	C	871	functional	97.7	3.9553	29.2259	58.8538	7.96499
4020	A	G	871	functional	111.45	4.10205	40.9146	49.9731	5.01025
4022	A	C	872	supertrans	152.4	11.7755	43.2079	35.3756	9.64098
4023	A	G	872	functional	125.45	4.10021	24.8048	61.0101	10.0849
4024	A	T	872	functional	105.6	3.5682	58.6777	35.5898	2.16422
4027	G	C	873	functional	99.35	1.76311	43.2535	52.8299	2.15346
4028	G	T	873	functional	99.35	1.76311	43.2535	52.8299	2.15346
4033	A	C	874	supertrans	144.4	0.248536	24.7255	74.2794	0.746644
4034	A	G	874	functional	98.5	1.62747	36.1266	59.5627	2.68325
4037	A	C	875	functional	122.65	4.49043	40.5262	49.4988	5.48462
4038	A	G	875	functional	130.3	1.51728	16.7253	74.9575	6.79999
4039	A	T	875	functional	90.55	3.95522	65.0422	29.2254	1.7772
4040	A	C	876	functional	138.1	1.79052	35.9635	59.2939	2.95207
4042	A	T	876	functional	138.1	1.79052	35.9635	59.2939	2.95207
4049	G	A	877	functional	139.8	0.523508	34.9109	63.6117	0.953895
4050	G	C	877	functional	139.8	0.523508	34.9109	63.6117	0.953895
4051	G	T	877	functional	112.5	0.00555493	54.9778	45.0121	0.00454799
4053	G	A	878	functional	120.4	0.155851	14.0293	84.8721	0.942843
4054	G	C	878	non-functional	8.4	0.956657	25.9375	70.5054	2.60046
4055	G	T	878	functional	136.1	1.5341	45.968	50.8025	1.69544
4064	G	A	880	functional	107.65	0.164426	18.0781	81.0205	0.736904
4065	G	C	880	functional	122.5	0.513851	11.4064	84.2828	3.79687
4068	A	C	881	functional	119.75	1.21424	29.7883	66.2951	2.70233
4069	A	G	881	supertrans	148.8	1.7772	29.2254	65.0422	3.95522
4070	A	T	881	functional	122.3	2.73795	49.76	45.0247	2.4774
4072	G	C	882	functional	102.7	0.899549	12.1113	80.9749	6.01429
4073	G	T	882	functional	102.7	0.899549	12.1113	80.9749	6.01429
4078	C	A	883	functional	99.8	0.238718	10.671	87.1409	1.94941
4079	C	G	883	supertrans	152.7	0.260831	11.6595	86.1524	1.9273
4080	C	T	883	functional	133.75	0.0678903	8.24938	90.9344	0.748367
4082	C	A	884	non-functional	0	0.0401939	10.8695	88.7621	0.32823
4083	C	G	884	functional	95.25	0.33799	15.1085	82.7033	1.85014
4084	C	T	884	supertrans	142.25	0.806547	24.1674	72.603	2.423
4092	C	A	886	functional	137.1	0.322149	9.6529	87.1176	2.9074
4093	C	G	886	functional	131.35	0.962941	15.8352	78.4324	4.76948
4094	C	T	886	supertrans	146.15	0.475239	8.63706	86.1476	4.74012
4096	A	C	887	functional	139.7	1.13396	18.6476	75.6199	4.59845
4097	A	G	887	functional	91.05	0.243798	8.07347	88.9953	2.68743
4098	A	T	887	functional	120.75	0.470286	10.4394	85.2499	3.84044
4099	C	A	888	functional	125.05	0.394454	7.92282	87.3346	4.34813
4100	C	G	888	functional	125.05	0.394454	7.92282	87.3346	4.34813
4104	C	A	889	functional	124.55	0.222357	7.36346	89.7053	2.70887
4105	C	G	889	functional	136.5	0.433775	7.88349	86.9011	4.78158
4106	C	T	889	non-functional	0	0.899549	12.1113	80.9749	6.01429
4108	A	C	890	supertrans	148.8	0.00329111	1.98074	97.8534	0.162589
4109	A	G	890	supertrans	149.2	0.522355	8.58994	85.6776	5.21006
4110	A	T	890	partially functional	33.1	1.06795	14.3786	78.7076	5.84589
4111	C	A	891	non-functional	0	NA	NA	NA	NA
4112	C	G	891	non-functional	0	NA	NA	NA	NA
4119	G	A	892	functional	118.5	0.665857	14.7807	80.9086	3.64487
4120	G	C	892	functional	120.55	0.962941	15.8352	78.4324	4.76948
4122	A	C	893	functional	122	1.61689	29.3857	65.399	3.59846
4123	A	G	893	functional	120.05	2.16422	35.5898	58.6777	3.5682
4124	A	T	893	supertrans	152.1	2.4774	45.0247	49.76	2.73795
4127	G	C	894	functional	130.3	0.82415	11.0961	81.99	6.08969
4128	G	T	894	functional	130.3	0.82415	11.0961	81.99	6.08969
4132	C	A	895	functional	119.8	0.358535	7.95873	87.7305	3.95219
4133	C	G	895	functional	126.15	0.473075	9.50197	85.7554	4.26951
4135	T	A	896	functional	123.8	0.222357	7.36346	89.7053	2.70887
4136	T	C	896	functional	116.25	0.019303	4.72328	94.8697	0.387711
4137	T	G	896	supertrans	152.1	0.427286	10.4824	85.601	3.48929
4146	C	A	898	non-functional	0	0.81315	13.372	80.8956	4.91927
4147	C	G	898	supertrans	170.65	0.805591	14.6409	80.1437	4.40976
4148	C	T	898	functional	127.35	0.805591	14.6409	80.1437	4.40976
4149	C	A	899	supertrans	155.35	1.32691	21.8206	72.447	4.4055
4150	C	G	899	supertrans	145.55	1.43161	23.5424	70.7252	4.3008
4151	C	T	899	functional	136.3	1.99845	26.9066	66.1796	4.91539
4160	C	A	901	functional	125.9	0.683321	11.237	83.0306	5.0491
4161	C	G	901	functional	136.4	0.621686	11.2986	83.486	4.59367
4162	C	T	901	functional	114.95	0.424019	11.4963	84.9466	3.1331
4166	C	A	902	supertrans	171.35	0.683321	11.237	83.0306	5.0491
4167	C	G	902	supertrans	140.85	0.81315	13.372	80.8956	4.91927
4168	C	T	902	functional	110.05	0.82415	11.0961	81.99	6.08969
4176	G	A	904	functional	120.2	6.19888	33.9324	50.6211	9.24764
4177	G	C	904	functional	120.2	6.19888	33.9324	50.6211	9.24764
4178	G	T	904	functional	101.65	69.2161	18.8636	2.55291	9.36738
4179	G	A	905	functional	114.05	1.43035	2.88037	63.9384	31.7509
4180	G	C	905	functional	116.6	67.6914	20.3883	2.75925	9.16104
4181	G	T	905	functional	135.4	69.2161	18.8636	2.55291	9.36738
4186	A	C	907	supertrans	156.55	6.77667	91.2393	1.84686	0.137173
4187	A	G	907	supertrans	140.1	37.513	37.513	12.487	12.487
4188	A	T	907	functional	127.75	16.2757	36.2222	32.7752	14.7269
4190	G	A	908	functional	125.15	3.09431	83.8948	12.548	0.462811
4191	G	C	908	functional	114	60.2357	36.5348	1.21929	2.01026
4192	G	T	908	functional	112.45	2.1558	96.3668	1.44508	0.0323275
4194	C	A	909	supertrans	156.55	6.77667	91.2393	1.84686	0.137173
4195	C	G	909	supertrans	156.55	6.77667	91.2393	1.84686	0.137173
4198	A	C	910	functional	110.3	92.5662	6.22096	0.0763768	1.13647
4199	A	G	910	functional	114.95	0.904252	6.68157	81.3981	11.016
4200	A	T	910	functional	139.85	39.6505	5.36611	6.55418	48.4292
4201	C	A	911	non-functional	0.3	3.14181	0.774761	19.0069	77.0766
4202	C	G	911	functional	139.85	39.6505	5.36611	6.55418	48.4292
4203	C	T	911	non-functional	0	1.5208	83.0327	15.1687	0.277824
4211	A	C	913	non-functional	2.35	80.1198	19.7573	0.0243195	0.0986204
4212	A	G	913	non-functional	0	82.8277	16.7226	0.0755291	0.374098
4215	A	C	914	partially functional	22.5	45.0125	54.9784	0.00502636	0.00411523
4216	A	G	914	non-functional	6.65	83.0638	16.7703	0.0278648	0.138015
4217	A	T	914	non-functional	0	90.6843	9.0919	0.0203919	0.203393
4220	G	C	915	partially functional	21.05	88.014	11.9114	0.00889288	0.06571
4221	G	T	915	partially functional	21.05	88.014	11.9114	0.00889288	0.06571
4225	C	G	916	non-functional	13	98.101	1.6258	0.00445378	0.268742
4227	G	A	917	non-functional	19.15	13.4471	36.5529	36.5529	13.4471
4228	G	C	917	non-functional	18.1	99.2241	0.73888	0.000273935	0.0367867
4229	G	T	917	partially functional	41.2	97.7736	1.97912	0.00490576	0.242357
4241	G	A	919	supertrans	142.7	39.9679	59.6251	0.243674	0.16334
4242	G	C	919	supertrans	166.3	97.2206	2.65643	0.00326983	0.11967
4243	G	T	919	supertrans	151.35	90.6987	4.08591	0.22482	4.99054
4244	C	A	920	partially functional	47.55	2.75243e-06	99.1837	0.816257	2.26518e-08
4245	C	G	920	functional	105.95	84.2714	13.93	0.255136	1.54348
4246	C	T	920	functional	88.9	0.53473	17.7078	79.361	2.39649
4252	C	A	922	functional	124.3	2.86395	4.72186	57.5241	34.8901
4253	C	G	922	functional	87.4	70.6561	9.56227	2.35803	17.4236
4255	T	A	923	non-functional	0.75	95.128	4.73614	0.0064429	0.129409
4256	T	C	923	functional	110.6	99.8056	0.183273	2.04654e-05	0.0111449
4257	T	G	923	supertrans	174.25	99.7119	0.247161	0.000101271	0.0408554
4263	C	A	925	functional	99.2	95.2468	4.74206	0.000529526	0.0106358
4264	C	G	925	functional	116	4.58438e-07	99.9389	0.0610879	2.80221e-10
[truncated: 566 more rows]

## Sheet: Table 3, 4
Table 3 EGFR mutations and confidence scores of functional types									Table 4 BRAF mutations and confidence scores of functional types
VID	Ref	Alt	Pos	LoF CS	SoF CS	GoF CS	CoF CS		VID	Ref	Alt	Pos	LoF CS	SoF CS	GoF CS	CoF CS
1	G	A	719	2.48976	50.0082	45.2493	2.25283		1	M	R	117	NA	NA	NA	NA
2	G	C	719	2.24985	55.1944	40.889	1.66673		2	I	T	326	0.222357	7.36346	89.7053	2.70887
3	G	S	719	2.48976	50.0082	45.2493	2.25283		3	K	Q	439	1.13396	18.6476	75.6199	4.59845
4	T	M	790	2.60768	47.3923	47.3923	2.60768		4	K	T	439	3.2282	39.3275	53.0866	4.35762
5	L	R	858	0.199651	59.6691	39.9974	0.13383		5	T	P	440	3.68828e-06	10.9097	89.0903	3.01191e-05
6	L	Q	858	0.191566	57.2527	42.4138	0.141915		6	V	L	459	0.267102	8.84519	88.2236	2.66412
7	D	Y	761	5.43314	73.1504	19.9358	1.4807		7	G	A	469	0.315156	57.1291	42.3223	0.233474
8	L	S	747	4.13923	55.7295	37.3566	2.77461		8	R	I	462	0.781116	70.3138	28.5875	0.317578
9	T	A	854	0.505411	37.2487	61.4127	0.833281		9	I	S	463	5.18718	69.8388	23.2473	1.72666
10	P	L	782	NA	NA	NA	NA		10	G	E	464	25.192	45.9029	18.6627	10.2423
11	F	L	788	NA	NA	NA	NA		11	G	V	464	4.50473	74.0788	20.1888	1.22768
12	R	K	748	0.632479	28.2726	69.5393	1.55565		12	G	R	464	2.35093e-05	76.8525	23.1475	7.08088e-06
13	L	S	707	3.43193	56.4368	37.8307	2.30049		13	G	A	466	2.03125	33.4031	60.8645	3.70117
14	T	A	710	0.516716	20.8998	76.6875	1.89599		14	G	E	466	14.1205	19.0607	38.3835	28.4352
15	E	V	711	3.59846	65.399	29.3857	1.61689		15	G	R	466	16.0665	26.4892	35.7567	21.6875
16	E	K	749	1.00414	36.7499	60.5904	1.65555		16	G	V	466	2.86758	52.1158	42.6688	2.34778
17	E	G	762	0.884503	58.9843	39.5383	0.5929		17	F	C	468	32.9984	24.4458	18.1099	24.4458
18	A	T	767	2.14347	28.8591	64.2271	4.77037		18	G	A	469	0.315156	57.1291	42.3223	0.233474
19	K	R	745	1.27548	25.6187	69.6387	3.46711		19	G	E	469	1.89091	69.204	28.1363	0.768787
20	G	S	735	1.69544	50.8025	45.968	1.5341		20	G	R	469	0.381711	76.4708	23.0326	0.114969
21	R	K	108	10.9856	24.4488	44.5486	20.017		21	G	S	469	1.44445	58.4243	39.163	0.968247
22	T	P	263	0.968247	39.163	58.4243	1.44445		22	G	V	469	1.05199	77.5315	21.1298	0.286701
23	A	V	289	2.13495	42.8816	52.3758	2.60764		23	K	E	475	0.768787	28.1363	69.204	1.89091
24	G	V	598	0.319846	78.2637	21.3293	0.0871681		24	N	S	581	0.0643066	95.1931	4.73939	0.00320164
25	L	Q	861	1.7772	29.2254	65.0422	3.95522		25	E	K	586	1.70482	93.0798	5.12155	0.0938045
26	R	G	680	1.99547	73.0305	24.3098	0.664233		26	D	A	587	1.59233	58.2764	39.0639	1.06737
27	G	A	136	1.9444	71.1615	26.1788	0.715303		27	D	G	594	95.1931	4.73939	0.00320164	0.0643066
28	G	C	136	9.34689	84.3558	5.66917	0.628162		28	D	K	594	94.7267	5.21217	0.00318595	0.057902
29	G	A	323	2.60768	47.3923	47.3923	2.60768		29	D	V	594	98.6503	1.33854	0.000149469	0.0110159
30	A	C	787	3.15139	69.9545	25.7348	1.15933		30	F	L	595	0.301389	99.5485	0.149665	0.000453119
31	C	A	866	1.46239	53.521	43.8193	1.19731		31	G	R	596	96.1213	3.54526	0.0118623	0.321618
32	G	A	865	2.03125	33.4031	60.8645	3.70117		32	L	Q	597	11.8322	87.4287	0.651045	0.0881093
33	C	T	866	1.69544	50.8025	45.968	1.5341		33	L	R	597	15.395	84.2715	0.28197	0.0515112
34	G	T	971	6.66162	66.4442	24.4435	2.45067		34	L	S	597	9.9585	89.8756	0.149333	0.0165466
35	G	A	988	0.406412	54.577	44.6839	0.332742		35	L	V	597	5.19961	94.4985	0.2861	0.0157421
36	D	Y	1006	3.95522	65.0422	29.2254	1.7772		36	T	I	599	7.53505	91.7957	0.618514	0.0507707
37	M	I	178	0.427286	10.4824	85.601	3.48929		37	V	D	600	0.686649	68.3108	30.694	0.308531
38	I	V	475	0.216451	10.6932	87.3227	1.76758		38	V	E	600	2.08395	69.011	28.0578	0.847271
39	S	R	492	0.325752	7.99152	88.0919	3.59082		39	V	G	600	3.95522	65.0422	29.2254	1.7772
40	F	S	712	2.04404	74.8084	22.5319	0.615654		40	V	K	600	2.70233	66.2951	29.7883	1.21424
41	F	S	795	1.3149	71.791	26.4104	0.483724		41	V	M	600	1.83512	67.1623	30.178	0.824575
42	G	S	796	0.775606	51.7223	46.8003	0.701797		42	V	R	600	0.430821	70.6641	28.7299	0.175159
43	G	V	796	2.66876	72.3572	24.0856	0.888355		43	K	E	601	0.327895	6.58595	88.6715	4.41469
44	T	I	751	0.669346	49.3307	49.3307	0.669346		44	K	N	601	0.327895	6.58595	88.6715	4.41469
45	R	K	748	0.632479	28.2726	69.5393	1.55565		45	R	Q	682	0.466867	11.4534	84.63	3.44971
46	T	I	847	4.57312	50.4103	41.2724	3.74415		46	A	V	728	0.972616	32.2086	64.8602	1.95861
47	Q	R	820	3.11238	41.9042	51.1819	3.80147
48	E	G	804	4.78377	47.7142	43.1736	4.32853
49	L	M	828	0.440138	17.8024	79.7849	1.97256
50	F	Y	856	0.956657	25.9375	70.5054	2.60046
51	F	L	856	3.0094	49.4885	44.7791	2.72302
52	A	V	839	2.09299	38.0382	56.7464	3.12237
53	G	D	863	0.0218492	11.8984	87.9183	0.161445
54	V	I	851	0.297399	17.9452	80.4246	1.33285
55	H	N	870	0.596732	72.5091	26.6746	0.219525
56	V	A	834	2.04768	45.4544	50.2349	2.26304
57	T	M	725	2.37129	47.6287	47.6287	2.37129
58	L	R	858	0.199651	59.6691	39.9974	0.13383
59	R	C	832	2.73795	49.76	45.0247	2.4774
60	A	D	868	0.962941	15.8352	78.4324	4.76948
61	T	M	852	2.01026	60.2357	36.5348	1.21929
62	T	A	725	1.96901	35.7851	58.9996	3.24635
63	L	P	703	1.86741	50.6305	45.8124	1.68971
64	S	F	720	0.826107	36.928	60.8839	1.36202
65	N	S	700	2.86758	52.1158	42.6688	2.34778
66	R	S	836	1.50181	60.7441	36.8432	0.910893
67	G	S	721	2.73795	49.76	45.0247	2.4774
68	K	G	708	5.7387	63.2587	28.424	2.57857
69	R	K	108	10.9856	24.4488	44.5486	20.017
70	L	R	62	0.919623	61.3263	37.1963	0.55778
71	V	M	651	1.40263	25.4915	69.2931	3.81273
72	R	C	222	21.2223	70.4605	6.39203	1.92524
73	T	P	263	0.968247	39.163	58.4243	1.44445
74	A	T	289	2.86395	34.8901	57.5241	4.72186
75	A	V	289	2.13495	42.8816	52.3758	2.60764
76	A	P	597	3.20586	23.6883	64.3914	8.71443
77	G	V	598	0.319846	78.2637	21.3293	0.0871681
78	C	Y	620	51.9746	21.1313	7.77377	19.1204
